# Supplementary material for: Surfactant-enhanced DNA accessibility to nuclease accelerates phenotypic β-lactam antibiotic susceptibility testing of Neisseria gonorrhoeae
Source: PLoS Biol. 2020 Mar 19;18(3):e3000651. doi: 10.1371/journal.pbio.3000651 (PMC7081974; doi:10.1371/journal.pbio.3000651)
Supplement: S2 Data — These are representative wells to show LAMP amplification curves. These curves are plotted in Fig 6B. A representative AST from one of the contrived samples using isolates was selected. See also S1, S3 and S4 Data for the complete dataset used in Fig 6B. AST, antibiotic susceptibility test; LAMP, loop-mediated isothermal amplification. (XLSX) [file pbio.3000651.s019.xlsx]

## Sheet: Transposed Data
time	well 1	well 2	well 3	well 4	well 5	well 6	well 7	well 8	well 9	well 10	well 11	well 12	well 13	well 14	well 15	well 16	well 17	well 18	well 19	well 20	well 21	well 22	well 23	well 24	well 25	well 26	well 27	well 28	well 29	well 30	well 31	well 32	well 33	well 34	well 35	well 36	well 37	well 38	well 39	well 40	well 41	well 42	well 43	well 44	well 45	well 46	well 47	well 48	well 49
0.5	138.825	123.94	101.003	130.551	138.603	123.792	125.729	129.982	142.93	152.23	132.199	155.304	129.583	120.211	149.694	197.787	138.054	140.718	163.866	129.553	122.707	149.445	180.965	135.809	166.98	172.076	164.604	137.152	166.704	165.352	111.24	155.444	151.665	169.166	128.868	178.018	172.158	164.699	174.524	174.011	172.61	148.921	123.637	212.629	189.212	156.202	121.532	172.746	139.426
1	85.6705	78.2668	68.6865	86.5299	79.1691	76.3276	76.2336	89.2432	92.937	93.3133	97.0242	96.4644	82.3535	73.6759	96.1174	130.435	95.0708	91.1333	102.863	88.1404	76.9092	93.9484	123.949	89.6239	104.357	113.422	103.797	86.3369	114.725	108.517	76.5191	106.139	96.4465	125.428	78.972	113.323	109.351	117.423	113.201	108.028	109.953	95.9731	84.3713	140.196	130.835	95.7986	92.3137	109.01	85.6675
1.5	30.8321	31.4868	36.0114	42.3687	28.3106	31.3932	29.0242	46.3081	32.1598	34.719	56.1004	39.0053	34.2536	30.1659	44.8511	57.4685	43.313	44.1931	50.3056	40.6086	39.4653	39.3504	61.1158	32.145	44.153	54.2774	36.1916	40.6564	60.7795	55.6387	33.4486	53.4008	43.3617	71.3957	29.9263	48.1797	44.943	70.3452	54.1683	50.7743	46.3101	46.0366	40.7664	71.2701	65.0824	39.9752	58.9734	47.8101	40.4342
2	8.04834	-0.880917	13.7025	13.6829	8.87593	3.47988	8.92671	22.5385	-10.1244	5.54723	24.531	10.4346	7.62653	13.5975	12.3703	15.7363	11.5034	16.9352	22.4346	8.37701	22.1643	10.0746	14.6081	-2.54962	12.9833	23.5689	-1.87234	14.1513	28.4577	28.9738	1.40679	20.3484	13.8454	30.3788	1.77204	11.3581	7.48054	36.0671	16.271	22.1986	5.91613	12.3506	10.381	29.1216	21.7576	12.5002	26.933	15.8619	12.2047
2.5	4.88116	-14.6367	6.13483	4.47785	6.40344	-10.0876	6.17315	11.9059	-11.6382	1.08156	6.32984	3.53728	3.07361	10.6494	4.84	4.22774	1.44826	3.13331	6.5843	-0.0235278	8.0765	1.31794	-5.46463	-1.61127	4.70467	12.2834	-5.63266	0.285181	13.9864	13.0371	-5.02878	6.08631	3.0362	16.6631	-1.96485	2.90688	-2.50923	19.4357	2.89833	12.3662	-4.25416	1.15288	2.04778	10.8694	2.48001	6.54145	-1.32936	6.55893	0.192287
3	-3.63263	-12.2328	6.73573	0.282194	0.89823	-14.1722	7.22272	5.62736	-0.598789	-1.63995	-5.63924	3.28246	0.80598	4.81785	6.64839	-2.5821	-5.1569	-6.7222	-3.53643	0.888168	-3.5204	1.60881	-9.40263	13.8021	0.62682	3.67261	-0.794613	-8.90686	8.00442	-0.890378	0.552703	-2.23007	-2.37385	20.8047	1.50334	4.14128	-2.35466	12.4231	3.83322	7.96384	0.0648105	4.50932	7.80928	3.9497	-3.33881	4.80478	-17.5149	1.391	-7.99327
3.5	-7.15515	-3.8427	-3.33047	-1.94177	0.0504037	-9.02028	9.68196	3.25735	0.947272	-4.77248	-11.7905	7.819	-4.81959	4.19455	3.76639	-4.19994	-12.0556	-9.49698	-6.90241	-6.99827	-2.6833	5.39235	-6.10228	17.3973	-0.351457	-1.88133	-1.95679	-10.4164	2.10881	-6.70135	1.1081	-7.99822	-4.46864	28.2232	2.21258	0.800633	-0.131697	3.58997	5.47137	3.19707	4.92724	5.8063	9.41469	3.23405	-0.592259	-2.44265	-18.7019	-1.16657	-8.9943
4	1.51502	2.30532	-10.0148	0.364878	-1.07576	-1.03351	8.47137	-1.6542	2.52535	-5.24038	-6.91472	6.85057	-1.7162	3.64396	-1.74875	-0.371979	-8.83323	-1.82318	-1.39445	-8.97642	3.4475	2.69791	-0.411014	3.31656	0.560835	-5.17241	-0.773109	-4.11714	-4.68579	-7.29716	-1.12794	-8.36237	-1.18989	18.9803	4.44463	-5.0087	5.00221	-3.39923	3.17277	-2.56159	5.80047	1.95133	1.23584	6.08637	-2.82919	-5.89369	-8.39274	-2.17557	5.43165
4.5	8.41432	7.43932	-4.08153	1.47296	-4.99491	7.50363	3.0337	-4.21068	3.54658	1.24173	5.598	-1.05763	4.26112	-4.16387	-2.89196	2.81371	2.68346	9.23852	3.8046	-4.68713	6.36737	-0.751603	4.14328	-11.8795	1.27123	-6.59308	2.87199	4.95939	-6.22887	-2.57542	0.134447	-3.83572	3.9391	-6.7314	3.56738	-2.2904	4.56925	-3.62156	-1.70895	-6.88566	2.86598	-1.03403	-6.98663	2.55987	-0.241373	-2.6922	13.928	-0.74993	18.6706
5	3.0515	5.60599	3.68474	0.447655	-0.141257	10.539	-9.50745	-2.30899	-2.33848	5.62126	13.0248	-9.62106	2.52474	-6.90204	-3.00329	4.2795	12.7111	8.80043	4.7368	2.71031	1.89752	-3.86602	5.38915	-13.2809	-0.184618	0.930635	3.71802	11.5425	-1.0235	6.10934	0.444637	6.91414	5.02468	-29.714	-1.47927	2.75858	-0.497898	-3.64335	-4.57252	-4.35644	-3.29738	-5.45581	-7.42735	-7.11102	5.83367	3.24902	23.1146	1.28271	7.55486
5.5	-2.19306	0.724826	7.00628	-0.625919	5.26329	6.18336	-18.9023	-0.710844	-4.08193	4.78982	5.72171	-7.27335	-1.05606	-1.59045	-2.77078	0.0608132	10.6512	0.00341639	3.29188	17.0633	-5.50868	-5.08143	6.38349	-9.35547	-1.92281	9.04357	-3.0655	6.93854	1.82493	11.355	-1.11194	15.5122	-0.931402	-31.5628	-10.2486	-0.401392	-6.5872	-5.34896	-6.19589	2.64278	-10.3611	-5.7771	-4.04583	-8.71897	1.16796	2.97475	7.56688	1.41835	-14.6696
6	-2.13665	-1.05855	-1.19928	-1.19522	-1.80212	-0.28381	-18.0377	2.16521	3.50197	1.09642	-3.67486	0.0562422	-3.11902	-1.32537	-1.42433	-3.61702	2.50402	-6.53069	6.52505	23.3762	-7.43916	-2.08267	8.05983	-3.99727	-0.114628	5.97336	-8.99366	-5.73576	0.487531	12.5925	-4.48135	9.4988	-4.92755	-21.6496	-11.3689	-2.5854	-10.9198	-0.821507	-9.65254	10.6762	-15.549	-1.70118	-2.59057	-5.26916	-1.98528	-0.498018	-4.11441	3.632	-20.5864
6.5	-4.02015	-4.82916	-9.95438	1.2228	-9.64088	-1.59323	-11.6871	9.88404	6.3398	-4.98749	4.50006	-1.45451	-5.33448	-4.87117	-3.09686	-4.42284	-0.429285	-9.94681	8.89419	13.6621	0.116962	1.53225	5.60179	-1.3672	-1.2044	3.4977	-9.72018	-12.5058	-2.1443	13.3995	-5.75046	-2.64971	-4.01385	-7.49804	-11.6404	-0.209279	-12.312	1.09642	-7.17469	13.3861	-10.7782	0.229018	-10.7094	-7.24165	6.10847	-5.64558	-1.41012	3.54779	-11.4161
7	-7.57209	-7.34441	-6.00255	9.85018	-7.13417	3.45643	-5.36889	7.40339	8.92708	-8.53152	22.0985	-0.434395	-9.24358	-4.82095	-9.87	-9.61022	-0.219802	-12.8481	0.914567	1.87061	6.12273	0.402206	3.07219	-1.09287	-7.09744	11.791	-6.97538	-2.60758	0.65315	7.16614	-3.71286	-4.42295	-1.611	11.3918	-10.0917	-0.901789	-9.73711	4.06542	1.85748	13.1371	3.06788	-3.37499	-15.8596	-12.326	12.5962	-9.77414	2.74746	-6.23923	-22.3548
7.5	-16.2181	-5.7943	8.64915	14.4458	4.63158	9.07532	-4.43254	-0.50805	9.43539	-10.2147	23.8314	-0.48285	-10.7341	4.35933	-15.9841	-11.3022	-8.81512	-8.99649	-6.08052	-1.46604	4.84765	2.28677	13.8574	-0.0899613	-8.74026	19.67	-3.7815	13.3562	10.5338	1.81468	-0.885817	-0.333552	-2.04011	20.9095	1.82036	-2.97891	-11.2384	9.78598	1.81531	14.3831	17.916	-4.23775	-0.740789	-11.2202	3.66585	-5.99634	6.19435	-11.7159	-33.8009
8	-28.5906	-1.18058	14.8409	12.8069	17.6469	15.9888	-8.04899	-1.10713	0.656729	-9.24044	5.45802	-6.66627	-3.09761	8.33886	-10.4721	-4.27112	-15.3334	-3.66384	-6.48682	-0.648063	9.51792	6.76634	44.6531	3.94631	-2.17848	14.5626	-0.108163	36.0927	12.084	2.42811	-2.67314	1.59185	0.397706	17.9793	16.4363	-5.82329	-13.1517	10.5074	-0.735918	15.7458	35.4069	0.158985	15.762	-3.86712	0.711098	-2.56466	15.1066	-9.29725	-10.3916
8.5	-28.0014	7.3427	11.487	7.80389	32.2199	18.9957	-8.76839	7.48398	-4.18711	-5.64962	-14.9497	-9.09812	7.21581	-0.188662	-2.29942	5.90388	-13.4151	0.321891	-5.17236	-3.20968	10.4315	3.21439	82.6122	5.81198	5.01822	2.27342	6.27845	80.716	7.11786	-0.0111833	-8.5387	4.13441	15.4641	14.6691	41.7113	-5.20239	-12.1414	14.1077	-0.302825	14.558	68.7308	-1.66349	16.3456	4.20801	12.3934	-1.31844	36.7414	-7.22592	17.9044
9	-21.5002	23.0858	5.91228	4.90986	52.5026	14.6057	-10.2054	14.1196	-4.53024	-4.75207	-20.5899	-5.71046	16.433	-1.10289	-3.50535	24.0252	0.87987	1.63625	1.30334	-8.55929	-0.515157	-6.99086	121.884	4.6155	6.44586	-2.90127	3.20013	136.324	5.7562	-5.69588	-9.96434	16.9811	44.5592	15.2186	86.4129	-5.77644	-8.32279	18.275	0.668841	21.0563	109.473	-8.65269	20.172	5.95991	21.6632	2.33465	62.5091	-5.06707	46.8038
9.5	-26.524	40.1391	-0.973158	6.38108	80.8394	0.322653	-13.4468	16.633	0.136023	-0.779087	-8.46454	3.15625	23.3197	2.614	-7.35931	51.2721	24.8864	-1.71462	19.5474	-11.3793	-12.1812	-14.6146	161.243	4.28357	4.85811	-3.79187	-6.99153	176.516	7.74762	-8.0384	-5.90706	37.1281	77.3813	13.4258	132.633	-13.8255	-0.528887	17.1089	-2.62192	39.7849	136.783	-11.9141	41.8781	8.45441	21.8199	2.83529	75.6193	1.86218	53.4557
10	-33.2243	68.196	5.67432	7.29529	107.95	-6.7509	-8.29135	28.2577	14.0167	13.4584	12.1636	7.62225	30.4472	1.88413	-9.20478	86.3107	50.1716	-1.30912	45.2145	-5.28167	-12.9379	-14.6496	192.548	2.35684	2.33947	-9.41581	-9.86955	211.304	6.80694	-4.87829	-3.47066	68.2514	112.753	-1.16092	165.698	-15.3006	9.37098	23.1131	-10.7048	71.15	151.975	-6.70801	71.4312	10.9607	21.1858	-1.1336	91.0542	8.06232	39.5468
10.5	-28.4105	102.808	17.0003	6.85337	130.034	1.76496	5.49327	46.898	20.9715	38.1635	26.7914	7.97736	44.1022	-0.929953	-9.71483	127.652	71.8434	-2.522	75.0228	3.0572	-2.46861	-6.04726	215.747	-0.310535	7.25167	-17.8788	-9.57885	241.168	-0.212002	-1.25596	-4.29091	100.52	151.959	-1.22572	175.016	-5.81455	33.9966	47.8245	-14.4916	111.563	168.09	4.89491	101.152	5.99637	22.5695	-5.07893	122.061	17.1211	45.8835
11	-17.2082	123.04	29.9249	8.81699	148.583	8.00951	30.7876	62.4517	13.3024	65.6347	44.0345	7.78685	62.4543	1.13499	-8.8334	172.28	92.2398	-5.21381	106.255	4.03701	22.4111	-1.77442	236.443	-0.174477	30.0488	-15.2495	-15.2567	266.913	-4.12476	-1.07962	-4.60733	132.39	187.152	10.2293	175.095	0.408791	79.1724	81.5556	-8.63826	147.322	186.738	19.1083	130.867	2.27324	17.9267	-0.958974	148.144	32.9115	61.4801
11.5	-3.82645	132.467	52.9801	10.3246	163.978	0.704702	67.4267	84.7015	-3.87637	87.9475	75.8032	5.97537	93.2397	7.2961	-11.6233	218.048	116.01	-8.72889	134.285	3.37191	54.9741	-4.6661	251.638	-0.550933	72.1747	-0.081417	-22.4037	296.601	-3.45462	-1.62158	-2.2565	164.526	213.22	7.15385	192.865	0.104981	129.601	105.82	2.60473	176.707	207.988	43.6437	158.738	-0.258704	12.2966	19.5705	153.851	60.7297	51.8088
12	10.3706	144.158	70.7279	9.64242	172.935	1.3577	101.3	110.434	-16.3847	108.982	111.915	1.03812	129.568	12.6885	-14.3985	255.229	142.863	-9.78513	162.018	6.04446	85.4886	-4.58517	271.109	1.54066	124.807	7.22206	-21.4456	325.944	4.13357	0.291364	-4.05366	194.148	234.996	-3.88155	223.591	-0.514454	174.102	119.562	20.1944	203.447	226.898	79.1259	169.611	-2.27698	13.2237	57.5913	158.776	94.8012	31.1353
12.5	29.2608	158.269	78.9339	11.1803	187.16	25.2131	121.176	133.789	-12.0015	130.723	141.031	-8.12916	159.215	19.8652	-12.492	278.241	166.416	-5.9796	192.62	15.6477	107.67	5.00638	297.372	0.939618	171.47	11.8879	-17.4727	342.603	24.6275	8.03331	-11.5594	217.072	249.739	-18.9049	251.841	-1.30121	208.701	135.215	52.1737	229.622	243.089	114.356	175.845	-0.917984	13.2031	101.987	182.565	128.669	27.9699
13	56.8878	160.723	89.7873	18.8775	206.359	59.8738	132.964	157.052	-5.38562	147.92	152.617	-20.5741	183.497	38.4984	-13.1845	293.983	179.239	-3.21867	220.59	19.0817	127.738	13.2246	322.906	-1.38331	204.734	14.6675	-19.714	356.747	57.3646	9.77442	-10.7184	232.206	259.461	-37.9644	273.327	1.95724	236.167	157.021	97.6479	257.826	265.21	140.998	185.74	4.1798	3.43506	137.078	207.285	156.699	26.0496
13.5	87.0422	158.873	106.623	35.7595	221.225	92.7167	147.525	176.061	-9.6726	164.952	135.385	-28.8953	199.042	68.7839	-13.3686	312.684	187.289	-0.231723	239.301	19.2617	150.008	13.7616	343.095	5.53202	229.742	5.96804	-18.0754	386.186	93.8277	10.5081	-1.33949	251.488	274.92	-37.2781	293.888	20.7371	260.037	181.344	145.736	282.333	293.79	163.372	193.402	12.0963	-11.4878	160.256	214.88	175.928	29.7943
14	117.713	167.822	129.424	68.3852	231.502	117.825	169.418	186.691	-20.7156	182.685	132.952	-22.1725	206.949	106.94	-11.4199	331.282	198.629	2.45746	251.78	23.0831	167.329	7.0864	360.075	15.2948	254.403	-7.87401	-4.48776	418.784	133.525	13.724	9.45363	275.76	296.67	-16.1199	306.56	54.7319	281.137	195.416	187.005	302.309	317.651	178.35	201.655	34.0905	-15.9162	184.322	205.718	194.862	47.1193
14.5	139.91	186.625	154.207	106.898	240.601	138.482	199.838	195.914	-21.507	187.918	148.064	-3.70524	213.585	145.295	-8.0115	349.281	206.913	-0.665352	268.088	26.659	171.052	2.42172	380.26	16.7656	276.081	-17.0742	17.4174	434.344	173.682	19.7477	17.2324	296.947	314.693	-6.9733	309.248	90.9678	296.338	205.532	223.299	313.891	336.385	190.582	217.85	70.9082	-8.30958	214.7	212.257	210.51	76.0747
15	157.075	196.989	180.1	131.386	244.624	151.95	222.423	210.873	-21.741	198.583	155.049	7.48965	224.013	176.383	2.18086	369.013	215.488	-2.8335	290.442	11.8618	178.481	2.74472	392.114	7.93963	294.247	-16.4739	46.3094	444.363	211.072	38.4234	24.4672	317.449	330.804	-14.917	315.422	120.188	320.358	214.501	247.604	328.094	350.948	204.788	232.321	101.049	-3.32507	239.367	234.312	217.113	89.2425
15.5	176.309	202.563	187.519	145.564	247.79	155.708	228.457	225.573	-28.7078	215.072	167.288	0.763765	241.75	198.465	19.2998	386.47	229.832	-1.27209	309.314	-9.40676	194.128	5.18999	397.783	4.0683	313.992	-10.2799	84.9372	467.949	240.291	70.5245	38.4085	339.985	356.992	-24.1843	332.233	144.652	346.521	223.703	270.978	348.703	359.91	220.29	242.179	127.099	-5.20506	254.712	257.625	223.553	88.4263
16	182.544	215.373	176.718	164.312	252.119	159.157	236.165	243.571	-31.3433	229.51	195.02	-4.09288	263.144	211.261	46.5934	405.578	246.618	1.75645	318.443	-11.8637	208.592	5.02994	408.749	10.5676	342.146	-4.78715	125.908	493.062	260.372	108.014	61.3495	356.538	382.216	-26.3883	355.159	170.152	359.833	239.161	299.391	366.968	372.018	231.182	255.55	159.429	-10.0715	271.023	270.574	240.626	54.4083
16.5	183.136	231.649	178.857	187.655	258.173	179.315	250.769	263.742	-27.2105	246.01	198.061	-2.99178	278.396	223.301	84.4495	426.474	258.559	6.63229	321.673	-7.10357	216.469	5.53935	429.567	16.8715	376.917	6.84211	155.592	506.507	284.19	148.759	92.242	364.363	396	-25.2821	377.491	205.152	363.764	248.001	323.482	381.966	381.708	241.072	273.321	194.568	-11.624	291.419	267.329	268.082	21.3347
17	192.985	238.979	196.867	206.869	271.649	200.661	264.62	278.973	-27.9971	262.006	190.026	-10.0408	295.619	239.737	120.792	438.671	264.354	6.04862	332.008	-6.94987	219.573	15.1574	454.367	19.3508	404.591	12.3645	177.571	513.215	316.066	180.019	122.966	377.446	406.094	-27.9867	398.863	240.723	365.643	253.037	329.825	396.848	391.013	254.519	286.309	216.062	-9.38423	313.933	258.182	288.282	43.5184
17.5	209.41	238.201	208.048	222.74	293.592	206.841	277.013	286.26	-22.9844	274.112	198.4	-20.5094	309.255	257.868	145.485	453.221	268.873	0.813205	358.007	-4.86749	227.959	33.296	467.659	19.7436	414.759	14.0323	198.935	520.077	340.949	197.568	146.219	397.933	419.036	-34.0572	420.848	259.265	381.294	261.366	339.425	411.684	405.18	266.438	299.216	227.593	0.577322	331.339	258.522	297.065	72.9107
18	230.832	239.641	211.45	235.79	304.68	214.772	284.741	283.273	-11.2061	280.484	214.626	-16.9607	320.481	270.513	170.785	468.525	275.255	1.7954	385.602	-6.07818	243.519	60.9251	477.126	19.2591	414.784	12.2164	218.714	527.549	354.506	208.795	165.248	424.599	431.009	-23.498	437.719	275.99	404.455	271.019	358.399	425.063	421.65	273.951	317.386	243.289	12.4603	341.92	252.491	299.955	46.5379
18.5	250.57	242.831	220.129	240.397	301.403	231.489	280.059	281.676	-2.30627	285.374	210.509	0.250289	330.856	287.889	197.523	483.438	276.579	4.03304	402.759	-5.61535	255.766	97.5661	491.75	30.1306	427.85	11.4572	238.196	537.975	370.977	225.504	178.821	447.985	444.234	-8.20065	444.948	300.509	423.031	282.936	383.474	436.141	436.307	280.237	321.702	262.619	15.5418	353.011	234.102	310.961	6.19022
19	260.257	253.081	233.614	243.455	307.356	247.559	279.716	290.26	1.85149	294.182	196.306	11.8521	337.355	311.346	212.838	504.219	275.739	3.88746	408.515	-1.47149	257.325	130.092	502.733	59.59	449.029	8.43287	257.853	549.012	388.479	240.993	185.907	456.157	461.346	-13.3589	448.893	321.196	440.993	290.944	408.289	445.837	451.969	291.806	312.266	276.804	8.53928	368.817	239.704	325.892	-6.43519
19.5	260.521	260.996	237.816	252.557	315.582	264.214	294.164	294.888	10.5778	308.641	200.181	10.0248	339.167	326.964	226.908	522.628	278.692	-1.47262	413.009	-3.65373	264.519	148.958	506.261	92.4999	470.072	6.47112	273.806	566.645	404.611	248.933	188.192	458.573	478.793	-17.3869	454.614	334.075	462.718	296.364	424.808	460.785	459.165	312.095	307.842	288.705	0.987985	386.326	264.382	340.174	-5.93486
20	261.08	264.636	233.86	264.496	317.962	279.69	314.543	300.842	12.6284	325.212	217.839	5.05172	342.649	339.323	255.785	530.736	285.857	-5.80193	430.035	-6.39308	281.373	165.526	505.286	123.086	486.189	6.95543	284.064	587.682	426.433	264.574	187.097	472.898	489.326	-14.7318	460.162	347.696	477.717	304.98	436.376	480.942	459.065	328.862	301.818	305.594	-1.99907	402.552	285.863	354.26	-12.0457
20.5	261.557	270.322	229.263	274.318	316.601	288.211	327.366	315.786	2.96126	332.545	232.633	-4.29955	350.497	351.827	283.001	539.506	288.62	-7.76016	450.289	3.45016	290.343	197.44	512.161	145.508	494.681	9.74874	299.655	602.792	445.762	282.372	191.699	494.256	493.458	-24.4502	471.238	365.159	490.234	315.948	453.018	494.803	470.757	337.53	294.502	322.943	-5.33406	419.909	290.336	365.348	-6.37885
21	269.433	268.95	233.069	281.82	319.895	293.285	334.657	330.719	-7.48864	333.588	226.993	-9.23665	366.712	358.88	295.307	556.086	294.348	-9.50154	462.683	23.0748	292.015	226.853	526.307	162.985	503.139	15.281	317.568	619.876	463.886	290.772	204.579	513.486	500.672	-24.0635	483.514	378.021	501.243	326.347	478.392	503.723	489.315	341.589	298.754	335.37	-5.59254	433.07	286.13	372.434	26.4366
21.5	288.786	263.769	240.411	291.636	324.133	297.787	342.103	339.885	-12.8856	339.003	218.345	-3.95097	384.211	370.228	306.452	572.58	313.963	-6.58371	470.402	43.2026	297.954	238.174	543.628	188.505	515.296	19.4736	329.434	632.521	490.021	299.514	220.27	524.05	512.917	-21.6656	496.498	392.753	501.937	331.575	498.561	519.57	505	347.642	316.815	351.251	-0.0199167	450.216	283.079	385.925	64.5155
22	303.494	260.21	253.707	304.522	328.737	298.044	349.955	344.708	-14.1161	351.526	229.011	-1.17039	402.372	386.063	323.695	592.143	331.641	-1.45673	473.018	64.7082	299.347	251.512	558.12	216.41	532.841	24.7503	339.118	640.2	513.109	310.688	236.937	527.455	532.139	-27.4456	514.298	415.952	507.311	332.195	506.814	540.762	522.71	353.558	342.331	363.383	5.93981	470.042	296.124	408.714	69.4313
22.5	311.919	263.908	260.835	318.623	340.397	305.162	360.259	353.562	-4.04616	361.987	246.89	-0.702514	415.622	400.383	339.198	608.292	333.322	0.202014	479.654	90.3308	299.31	271.43	568.634	237.434	550.985	25.2321	349.248	653.467	524.439	314.606	245.521	535.977	551.526	-32.6446	530.858	435.433	523.185	337.52	519.695	553.905	535.821	357.46	356.56	363.694	4.55151	476.179	318.219	418.14	45.852
23	317.188	276.533	266.748	332.948	351.798	311.879	369.733	362.611	12.5963	364.81	256.469	-0.114439	414.022	420.839	353.269	618.915	332.214	6.99197	496.975	115.894	315.132	292.96	587.374	255.282	566.479	12.8243	364.652	674.069	531.843	320.961	253.606	557.127	561.417	-25.8472	538.702	453.045	534.816	350.935	536.282	563.528	538.036	360.571	358.218	364.729	1.18395	477.588	336.277	410.366	26.5974
23.5	314.642	293.515	273.436	350.437	360.866	317.72	378.762	369.004	37.8793	371.869	260.296	-0.951251	411.1	444.579	363.665	628.995	337.259	10.4449	517.669	144.555	332.401	316.602	611.884	278.901	581.485	-7.53489	386.689	690.46	538.885	338.447	260.659	584.185	564.219	-6.1259	541.115	468.53	545.008	362.68	557.195	574.221	535.235	364.941	353.054	378.084	-1.10418	500.108	334.324	411.049	8.44302
24	305.768	306.355	273.073	357.489	369.314	335.503	387.529	375.271	59.2036	383.361	271.016	-5.05492	424.769	458.903	367.405	639.282	343.351	7.37028	526.946	181.541	338.972	331.516	626.399	298.898	593.834	-16.972	407.05	703.273	547.484	351.449	268.694	606.199	575.156	6.86312	548.044	481.055	559.75	369.405	576.262	585.873	540.176	371.445	347.813	394.908	1.085	524.55	317.839	429.671	16.273
24.5	311.682	312.631	284.75	348.153	377.07	352.878	397.727	385.257	80.8099	396.497	274.703	1.90017	447.145	470.959	374.171	647.756	347.39	10.4957	527.139	204.75	341.267	340.212	621.587	310.851	602.164	-9.29198	418.315	715.692	560.74	357.032	275.614	620.084	583.841	6.28203	560.656	490.122	575.622	375.163	588.644	599.789	557.687	377.679	351.656	413.116	8.61971	539.282	316.362	443.179	36.3739
25	325.452	319.804	300.048	340.521	380.587	352.081	404.605	396.825	105.415	409.185	274.369	11.2871	464.087	483.631	394.996	655.718	351.162	21.8986	536.334	206.957	342.813	353.064	621.077	320.215	614.864	1.83194	424.13	725.675	575.441	364.655	282.5	631.771	596.779	-1.80718	567.177	501.686	586.254	383.771	598.296	607.151	578.881	391.272	367.776	430.881	15.3391	551.566	336.753	456.603	39.1997
25.5	325.732	327.441	302.195	355.448	381.804	351.946	408.173	400.714	127.482	415.999	278.523	14.3291	475.15	486.702	418.97	661.846	360.791	32.315	550.802	221.318	347.838	368.628	635.157	329.289	636.265	4.92663	436.691	730.523	600.011	376.536	293.994	640.299	623.843	-11.7764	576.849	520.292	595.07	391.99	614.239	610.904	598.523	412.794	380.194	438.839	36.1451	563.478	350.719	462.288	34.7918
26	323.374	329.793	307.37	364.854	389.433	356.587	408.385	397.817	148.935	423.322	279.094	14.4871	484.365	486.912	433.816	676.598	365.263	48.2109	573.913	246.531	357.708	381.6	644.734	338.486	650.94	11.5489	445.67	738.842	624.79	391.426	306.163	649.21	648.393	-15.458	590.352	532.802	606.712	397.722	635.753	621.651	615.128	429.271	380.517	445.244	73.8173	575.035	344.398	467.814	26.5414
26.5	337.477	326.6	317.581	363.402	403.76	359.968	410.407	409.979	175.171	426.186	281.64	5.85908	492.851	492.821	439.866	694.753	367.251	65.0876	595.378	260.438	371.909	395.721	642.77	350.502	662.882	17.6544	445.843	751.267	638.63	397.284	312.176	662.744	652.731	-24.4102	605.535	543.123	618.994	401.482	654.996	630.526	623.715	431.481	375.583	455.478	123.489	581.689	338.578	483.278	24.8301
27	352.382	326.148	320.932	365.761	409.255	364.432	420.69	428.478	197.573	432.943	287.543	-7.0926	497.9	502.386	448.488	707.358	380.522	76.4446	600.294	262.706	382.295	405.073	647.732	363.57	676.842	6.23705	451.087	762.037	645.683	404.319	311.558	676.833	645.785	-32.8302	621.73	557.096	626.419	408.866	665.496	631.684	623.303	427.208	374.97	468.536	166.182	589.178	339.974	496.987	50.0092
27.5	352.67	327.657	324.956	375.045	406.24	367.946	435.931	430.297	207.72	450.384	294.911	-11.9299	495.08	514.653	467.479	719.36	397.2	82.7573	598.312	271.723	387.004	413.167	665.129	374.617	693.464	-9.14937	466.876	774.181	652.231	418.601	316.996	688.705	648.956	-33.3065	629.597	569.321	626.441	427.819	669.525	635.21	624.524	427.276	377.668	477.564	197.213	599.082	337.641	505.669	62.2464
28	345.351	336.131	324.892	386.668	404.109	361.769	448.842	421.112	218.598	469.468	306.466	-13.8479	493.552	527.448	479.926	736.586	408.162	94.6151	615.628	291.612	391.385	428.027	681.747	388.452	710.641	-9.8439	489.746	788.958	666.575	433.741	325.697	702.116	662.236	-25.4761	635.678	585.997	630.855	442.062	678.571	647.656	628.16	433.497	383.796	480.497	222.61	614.209	339.103	521.186	27.7447
28.5	350.797	350.158	321.932	396.9	410.853	361.671	452.388	417.686	235.078	474.382	321.814	-14.2936	497.048	543.425	483.92	757.862	415.423	119.958	639.171	311.726	392.249	441.737	695.602	401.944	731.458	-0.328575	519.443	811.746	687.957	446.587	334.199	713.449	678.298	-6.20628	643.09	603.135	637.106	438.279	696.64	666.406	636.847	446.254	396.517	484.289	247.068	626.383	352.825	535.252	23.8291
29	369.776	365.467	318.03	403.614	417.3	378.121	451.604	425.321	242.287	477.125	332.374	-0.841042	501.98	558.689	487.551	772.486	414.581	146.109	647.075	327.901	380.161	447.2	709.22	409.899	748.226	13.252	536.762	831.047	711.543	452.559	340.93	716.424	690.545	9.93852	650.466	616.032	644.795	429.837	710.531	682.893	653.197	463.865	416.971	500.902	261.299	636.298	371.023	541.997	79.4572
29.5	381.64	371.772	328.072	408.441	424.305	392.08	457.257	435.134	247.159	484.561	332.304	28.643	507.274	565.67	497.463	779.797	414.59	167.356	657.255	339.057	374.849	451.598	721.334	431.501	751.312	25.8912	541.369	840.688	725.05	452.511	340.497	721.22	694.625	-3.64717	661.653	622.341	657.236	431.812	728.035	693.499	673.327	480.426	427.071	523.042	278.021	651.792	400.729	541.605	161.985
30	381.164	369.525	346.127	412.801	430.549	394.205	470.918	443.287	263.55	495.479	319.985	69.0522	525.622	575.416	516.382	781.413	420.81	182.212	673.981	343.29	382.71	468.422	732.695	453.678	755.34	50.3891	539.484	842.412	728.971	452.753	341.106	732.509	704.104	-27.4541	668.918	625.727	660.231	443.531	743.782	699.061	691.714	488.334	425.941	538.475	303.641	675.733	400.972	535.344	249.637
30.5	369.929	369.13	356.629	426.993	439.578	391.026	481.34	455.402	285.408	504.207	312.752	126.345	544.677	587.55	535.769	788.465	427.608	202.756	683.392	349.861	386.645	494.67	738.152	461.363	771.735	94.2126	537.499	833.946	736.369	456.091	353.061	751.678	719.281	-35.3001	672.604	630.174	658.18	451.646	756.607	705.317	693.88	495.14	426.04	544.507	325.08	687.487	373.96	539.114	281.242
31	362.621	364.409	352.419	443.578	451.719	394.378	485.721	463.856	306.069	512.066	329.51	172.976	549.221	594.572	549.278	801.988	433.166	233.607	691.27	359.524	386.303	517.061	738.398	459.75	800.129	145.458	539.959	832.147	746.671	469.014	357.866	769.498	725.461	-18.9134	686.157	635.875	665.628	459.975	766.191	713.175	691.477	503.563	426.34	542.568	344.272	684.167	355.159	552.879	263.426
31.5	361.539	358.367	348.895	449.895	457.199	408.838	491.372	460.735	313.032	518.71	365.316	203.197	545.579	601.401	555.568	813.673	438.566	248.141	701.519	371.162	398.399	520.027	749.555	457.251	822.63	196.687	554.617	844.206	754.542	484.972	354.166	781.892	721.027	3.58619	708.598	646.944	672.705	470.937	774.531	719.035	703.065	512.688	427.232	547.543	365.381	684.842	367.001	562.658	262.626
32	365.807	356.698	351.362	447.84	463.546	422.112	501.572	458.666	317.371	523.474	398.634	230.963	554.764	604.598	552.453	824.489	443.402	254.043	707.379	382.666	413.6	516.707	768.354	456.928	831.271	236.437	575.877	863.517	766.287	497.247	353.685	790.191	725.523	21.7969	726.442	659.487	675.279	475.462	778.832	723.365	717.829	519.294	431.255	566.324	378.583	703.155	390.445	575.261	276.399
32.5	385.496	361.535	348.593	447.089	476.042	423.055	516.318	462.296	328.882	534.547	395.852	250.196	572.61	611.295	556.909	831.405	448.442	277.02	708.446	387.884	416.495	529.412	777.849	462.457	838.224	263.174	589.647	880.745	781.14	504.892	362.025	793.207	744.363	26.1652	731.888	678.534	682.034	472.523	784.661	734.052	730.224	529.838	440.792	580.823	385.456	727.087	416.382	591.537	290.703
33	410.952	373.236	351.826	458.946	478.168	425.116	528.436	469.541	345.706	554.213	365.143	277.924	580.651	626.346	577.215	837.699	447.374	304.126	716.727	393.392	421.318	549.04	782.887	478.848	847.011	288.782	592.686	892.001	799.048	510.653	372.003	793.414	753.979	54.5399	737.533	699.253	700.981	470.586	798.039	745.074	744.038	540.6	451.958	585.554	403.744	740.47	426.481	604.752	301.561
33.5	426.553	380.611	370.623	479.12	471.923	443.486	528.158	478.92	366.691	580.343	343.019	313.776	580.521	639.882	597.45	850.723	447.974	323.664	731.387	402.237	438.328	563.959	791.352	501.937	856.099	315.439	597.735	901.619	813.154	521.046	376.512	800.685	762.778	110.258	743.093	713.38	719.073	483.401	813.579	752.941	754.102	545.933	462.994	595.701	433.959	742.467	401.73	617.359	319.853
34	426.285	382.694	376.577	489.132	476.321	469.93	523.948	490.128	386.227	592.225	345.64	328.223	583.551	648.928	607.759	869.794	459.16	341.571	744.937	408.624	448.46	572.552	808.893	513.437	860.807	348.13	605.73	916.367	827.17	533.392	379.331	807.169	779.405	176.688	749.667	726.481	731.185	501.61	820.683	763.271	754.874	544.482	463.361	610.955	460.234	742.164	382.121	625.275	336.185
34.5	423.545	383.164	374.155	487.79	486.555	487.712	528.582	494.522	399.631	589.015	357.14	333.06	592.835	659.625	611.566	883.17	470.211	361.393	748.251	406.128	444.037	581.128	829.253	514.644	867.704	376.858	620.036	925.761	839.835	539.64	391.09	812.164	791.262	243.626	763.495	747.153	741.255	516.546	826.896	775.824	753.802	541.432	461.14	620.605	468.007	743.172	403.74	625.859	338.856
35	419.372	378.362	381.359	483.198	490.083	484.023	539.519	499.55	395.191	584.042	368.012	352.147	598.06	673.045	608.521	886.952	474.953	383.957	750.679	410.008	446.908	593.6	840.536	517.204	877.839	394.273	639.787	929.962	852.617	538.975	403.464	831.462	799.089	285.369	778.031	762.966	752.024	523.058	837.92	782.415	755.879	545.978	465.582	631.159	472.802	757.443	449.068	633.339	298.711
35.5	412.469	379.156	390.377	490.325	497.629	466.888	550.532	499.79	386.489	586.266	385.912	381.447	600.499	687.861	613.768	892.707	476.997	397.651	769.123	419.819	452.01	606.814	840.903	523.264	887.732	411.88	656.698	946.243	865.659	537.498	409.618	849.963	809.17	294.193	786.116	763.964	758.625	524.38	849.476	779.368	765.712	553.177	461.13	647.146	488.433	779.598	469.847	646.054	269.23
36	408.829	392.821	402.449	519.255	506.878	463.376	560.028	490.074	404.322	600.258	407.951	403.275	609.628	699.049	632.204	895.662	473.799	404.942	788.176	435.462	453.679	623.439	843.152	526.143	898.171	437.264	665.936	966.445	872.419	539.558	409.406	857.738	813.471	313.706	800.555	762.457	756.369	527.653	871.778	777.145	781.744	553.471	450.09	658.263	511.193	796	464.309	653.32	288.715
36.5	412.137	410.429	404.382	550.212	510.293	473.24	559.035	484.499	436.381	615.365	419.586	415.587	617.408	703.12	654.367	890.493	468.32	409.716	797.336	452.768	459.944	642.879	852.088	516.326	909.09	457.395	665.049	981.35	880.402	546.994	411.601	863.632	812.901	350.645	818.39	766.835	752.413	534.564	894.232	782.955	793.524	553.352	445.568	667.651	524.495	811.39	461.998	658.087	323.933
[truncated: 51 more columns]
