# Supplementary material for: Surfactant-enhanced DNA accessibility to nuclease accelerates phenotypic β-lactam antibiotic susceptibility testing of Neisseria gonorrhoeae
Source: PLoS Biol. 2020 Mar 19;18(3):e3000651. doi: 10.1371/journal.pbio.3000651 (PMC7081974; doi:10.1371/journal.pbio.3000651)
Supplement: S3 Table — The PCR Cq is measured by qPCR (see Methods) and the mean of the PCR triplicates is reported. Eqs 1 and 2 are used to calculate the percentage accessibility, and the error in that calculation is based on the error propagation of the standard deviation of qPCR triplicates. “Treated” indicates the isolate was exposed to an ABX; “control” indicates no ABX exposure. Data are plotted in Fig 3G–3X., negative percentages were set to 0 for visualization, as described in Methods. ABXs included PEN, CRO, and CFM. Isolate categories included S and R. ABX, antibiotic; CFM, cefixime; Cq, quantitation cycle; CRO, ceftriaxone; qPCR, quantitative PCR; R, resistant to ABX; S, susceptible to ABX. (XLSX) [file pbio.3000651.s007.xlsx]

## Sheet: Sheet1
Enhancer	Isolate	ABX	Isolate Category	Cq (control)	Cq (treated)	% Accessibility	% Accessibility Error
CHAPS	16	PEN	S	20.18	21.33	55.04	1.72
CHAPS	17	PEN	S	20.76	25.18	95.34	4.68
CHAPS	19	PEN	R	21.76	21.2	-47.09	0.65
CHAPS	44	PEN	R	19.97	20.16	12.54	1.9
CHAPS	15	PEN	S	19.3	21.62	79.93	2.63
CHAPS	18	PEN	R	19.51	19.68	11.32	1.17
CHAPS	41	PEN	R	19.12	19.4	17.26	2.45
CHAPS	16	CRO	S	21.4	22.01	34.63	2.72
CHAPS	19	CRO	S	21.12	22.76	67.99	2.72
CHAPS	2	CRO	S	20.93	24.32	90.48	8.53
CHAPS	5	CRO	S	21.39	22.52	54.2	8.14
CHAPS	15	CRO	S	21.51	21.81	18.96	2.6
CHAPS	18	CRO	S	20.66	20.42	-17.83	2.06
CHAPS	30	CRO	R	21.36	21.41	3.41	2.71
CHAPS	41	CRO	S	22.46	21.14	-149.67	3.71
CHAPS	44	CFM	S	19.97	20.53	32.17	2.04
CHAPS	15	CFM	S	19.3	19.96	36.57	1.18
CHAPS	18	CFM	S	19.51	20.02	29.78	1.13
CHAPS	30	CFM	R	19.97	20.2	14.74	1.93
CHAPS	41	CFM	R	19.12	19.5	22.98	1.98
CHAPS	165	CFM	R	21.88	22.28	24.56	2.25
CHAPS	166	CFM	R	21.51	21.72	13.55	2.71
TNP	16	PEN	S	22.25	22.51	16.49	4.73
TNP	17	PEN	S	21.15	24.14	87.44	1.31
TNP	19	PEN	R	21.06	21.09	2.06	1.46
TNP	44	PEN	R	21.98	22.12	9.67	6.55
TNP	15	PEN	S	21.85	22.94	53.13	25.69
TNP	18	PEN	R	20.81	21.21	24.21	8.37
TNP	16	CRO	S	21.55	23.57	75.29	2.54
TNP	17	CRO	S	20.93	26.13	97.27	3.76
TNP	19	CRO	S	20.7	21.68	49.07	1.93
TNP	44	CRO	S	21.35	24.05	84.68	4.68
TNP	15	CRO	S	21.59	23.79	78.29	6.09
TNP	18	CRO	S	20.67	21.78	53.67	2.16
TNP	30	CRO	R	21.07	21.55	28.14	2.29
TNP	17	CFM	S	19.98	20.36	23.16	5.45
TNP	15	CFM	S	20.56	21.02	26.96	14.06
TNP	30	CFM	R	21.12	21.23	7.56	6.57
TNP	165	CFM	R	19.72	19.81	6.05	5.87
TNP	166	CFM	R	19.27	19.23	-2.57	2.42
TNP	175	CFM	S	19.69	20.22	30.42	3.69
TNP	176	CFM	R	21.45	21.36	-6.68	0.86
TNP	179	CFM	S	20.49	20.71	13.94	5.88
BAC	16	PEN	S	25.85	24.77	-110.43	15.36
BAC	17	PEN	S	23.45	23.2	-18.37	11.84
BAC	19	PEN	R	27.23	26.94	-22.08	10.42
BAC	44	PEN	R	24.38	24.03	-27.75	16.18
BAC	15	PEN	S	24.65	24.37	-21.98	14.02
BAC	18	PEN	R	26.69	26.27	-33.32	6.59
BAC	16	CRO	S	25.85	25.35	-41.09	15.56
BAC	17	CRO	S	23.45	24.45	50	17.65
BAC	19	CRO	S	26.69	26.43	-19.41	14.35
BAC	44	CRO	S	24.38	24.28	-7.43	10.64
BAC	15	CRO	S	24.65	24.32	-25.7	19.57
BAC	18	CRO	S	26.85	30.36	91.24	44.41
BAC	30	CRO	R	23.98	23.46	-43.06	18.74
BAC	17	CFM	S	23.15	22.03	-117.35	11.91
BAC	15	CFM	S	24.1	24.34	15.33	12.19
BAC	30	CFM	R	24.13	23.31	-75.73	18.02
BAC	165	CFM	R	23.5	23.2	-22.83	30.47
BAC	166	CFM	R	23.25	22.02	-133.49	15.57
BAC	175	CFM	S	23.8	23.13	-59.48	6.46
BAC	176	CFM	R	24.71	24.64	-4.97	11.09
BAC	179	CFM	S	24.81	24.39	-33.79	15.64
SDS	16	PEN	S	20.76	21.12	21.72	1.84
SDS	17	PEN	S	19.93	20.67	40.13	2.83
SDS	19	PEN	R	22.87	23.16	18.35	1.24
SDS	44	PEN	R	20.82	20.87	2.96	3.16
SDS	15	PEN	S	20.73	20.83	6.48	2.57
SDS	18	PEN	R	22.67	22.65	-1.54	11.45
SDS	16	CRO	S	22.05	22.29	15.33	6.94
SDS	17	CRO	S	21.42	22.3	45.91	2.3
SDS	19	CRO	S	21.17	21.35	11.73	7.18
SDS	44	CRO	S	21.62	21.78	10.5	5.11
SDS	15	CRO	S	21.44	21.86	25.43	4.89
SDS	18	CRO	S	20.68	20.88	13.15	2.61
SDS	30	CRO	R	21.15	21.03	-8.67	4.3
SDS	17	CFM	S	20	19.72	-21.7	7.87
SDS	15	CFM	S	21.13	21.06	-4.73	2.36
SDS	30	CFM	R	21.67	21.75	4.96	3.05
SDS	165	CFM	R	20.27	20.5	14.74	3.48
SDS	166	CFM	R	19.62	19.68	4.07	3.16
SDS	175	CFM	S	20.32	20.64	20.26	2.63
SDS	176	CFM	R	21.71	21.97	16.1	3.36
SDS	179	CFM	S	20.79	20.73	-4.73	3.57
TRIS	16	PEN	S	27.39	27.75	21.88	7.82
TRIS	17	PEN	S	27.03	28.09	52.12	8.09
TRIS	19	PEN	R	26.18	26.18	0.11	4.47
TRIS	44	PEN	R	26.39	26.77	23.18	15.76
TRIS	15	PEN	S	24.57	25.15	33.26	5.71
TRIS	18	PEN	R	24.2	24.2	-0.23	7.25
TRIS	41	PEN	R	24.22	23.98	-18.37	4.86
TRIS	19	CRO	S	24.31	24.28	-1.63	4.72
TRIS	44	CRO	S	24.59	24.4	-14.34	5.9
TRIS	2	CRO	S	24.52	24.07	-36.29	2.36
TRIS	5	CRO	S	24.47	24.54	4.29	3.45
TRIS	15	CRO	S	24.57	24.68	7.56	7.29
TRIS	18	CRO	S	24.2	24.09	-7.92	5.57
TRIS	30	CRO	R	24.73	24.3	-35.35	6.54
TRIS	41	CRO	S	24.22	23.6	-54.04	2.21
TRIS	17	CFM	S	24.53	24.65	7.56	7.26
TRIS	15	CFM	S	24.35	24.38	1.83	18.92
TRIS	30	CFM	R	25.17	24.96	-16.2	4.25
TRIS	165	CFM	R	23.98	23.69	-21.98	8.45
TRIS	166	CFM	R	24.36	24.06	-22.83	6.73
TRIS	175	CFM	S	23.85	23.91	4.29	6.07
TRIS	176	CFM	R	25.45	25.61	10.5	12.42
TRIS	179	CFM	S	24.26	24.56	18.77	3.97
water	16	PEN	S	27.78	28.29	29.39	12.79
water	17	PEN	S	27.17	28.12	48.44	9.49
water	19	PEN	R	26.37	26.04	-25.44	5.33
water	44	PEN	R	26.52	26.67	9.64	7.61
water	15	PEN	S	24.04	24.84	42.43	6.87
water	18	PEN	R	23.49	24.1	34.48	9.63
water	41	PEN	R	23.67	24.14	27.8	9.15
water	19	CRO	S	23.67	24.38	39.01	3.22
water	44	CRO	S	24.49	24.45	-2.57	6.28
water	2	CRO	S	24.37	24.37	0	4.03
water	5	CRO	S	24.07	24.53	27.13	6.7
water	15	CRO	S	24.04	24.69	36.27	12.98
water	18	CRO	S	23.49	24.16	37.15	3.81
water	30	CRO	R	23.71	24.5	41.9	4.75
water	41	CRO	S	23.67	23.89	14.14	9.25
water	17	CFM	S	24.23	24.64	24.74	10.2
water	15	CFM	S	24.55	24.29	-19.47	4.96
water	30	CFM	R	24.84	25.04	12.74	7.62
water	165	CFM	R	23.79	23.48	-23.97	5.64
water	166	CFM	R	23.89	23.84	-4.01	5.6
water	175	CFM	S	23.68	23.65	-2.34	2.06
water	176	CFM	R	25.3	25.33	1.83	8.58
water	179	CFM	S	24.29	24.31	0.92	5.08
