# Supplementary material for: Surfactant-enhanced DNA accessibility to nuclease accelerates phenotypic β-lactam antibiotic susceptibility testing of Neisseria gonorrhoeae
Source: PLoS Biol. 2020 Mar 19;18(3):e3000651. doi: 10.1371/journal.pbio.3000651 (PMC7081974; doi:10.1371/journal.pbio.3000651)
Supplement: S4 Data — These are representative wells to show LAMP amplification curves. These curves are plotted in Fig 6B. A representative AST from one of the contrived samples using isolates was selected. See also S1–S3 Data for the complete dataset used in Fig 6B. AST, antibiotic susceptibility test; LAMP, loop-mediated isothermal amplification. (XLSX) [file pbio.3000651.s021.xlsx]

## Sheet: Transposed Data
time	well 1	well 2	well 3	well 4	well 5	well 6	well 7	well 8	well 9	well 10	well 11	well 12	well 13	well 14	well 15	well 16	well 17	well 18	well 19	well 20	well 21	well 22	well 23	well 24	well 25	well 26	well 27	well 28	well 29	well 30	well 31	well 32	well 33	well 34	well 35	well 36	well 37	well 38	well 39	well 40	well 41	well 42	well 43	well 44	well 45	well 46	well 47	well 48	well 49
0.5	194.263	203.303	204.701	190.716	174.521	192.574	211.319	197.616	194.539	201.396	212.172	187.528	166.215	186.466	212.58	200.808	194.943	186.617	231.397	194.127	160.547	168.448	177.958	190.863	191.594	192.897	189.4	186.518	203.541	176.375	191.738	193.186	211.196	196.725	179.019	196.748	197.438	200.7	200.047	164.987	164.602	193.418	191.516	178.627	193.343	199.32	190.101	199.394	197.662
1	130.472	142.839	147.082	140.208	120.974	131.14	155.901	130.529	131.457	147.077	148.362	123.635	122.128	132.165	153.523	133.348	122.405	128.708	156.703	135.412	105.223	115.783	117.953	132.824	127.628	132.855	135.181	128.495	146.879	116.272	133.931	135.62	154.122	129.033	124.531	144.744	138.205	124.677	136.995	115.736	117.61	125.686	131.227	121.387	131.844	139.049	127.044	132.275	137.628
1.5	64.3664	73.2504	80.9354	74.7135	60.7228	65.5951	81.0761	61.5723	64.2897	80.3014	72.4952	55.7677	54.4218	55.6566	84.2582	65.6356	50.0143	65.7435	76.567	69.0114	44.9863	62.7088	51.5484	64.2163	59.076	64.8904	66.7891	64.0153	73.61	53.4081	66.5986	72.3988	78.6336	56.8361	64.5382	76.9864	73.7423	46.2853	66.9338	58.608	59.5447	71.3429	61.4904	63.896	67.4292	69.1023	63.5487	56.8476	66.8741
2	20.1325	27.2876	35.7285	27.1284	22.5104	20.6763	18.6112	22.0606	19.4692	33.9014	21.0021	10.8838	8.7068	3.5556	38.2388	24.2429	9.7948	28.3965	26.3552	20.5527	8.13402	22.5617	8.50919	15.7674	17.4183	21.2873	23.7553	21.8394	23.6626	13.1593	16.957	30.0769	17.6649	15.1139	25.4047	28.2343	32.8865	7.99771	23.8582	20.4872	24.4102	26.9278	17.2873	30.335	24.3118	21.0013	26.0943	17.6938	18.2208
2.5	0.678603	10.0872	14.6985	7.65708	2.78073	4.59556	-12.1684	6.91643	4.91547	15.0583	0.0323717	-5.78405	-4.57339	-5.77321	14.9754	2.44826	-4.46525	15.2356	10.1638	1.74204	1.3368	3.07704	-2.24622	-2.00855	6.12246	4.92529	13.7129	5.5253	5.26197	-1.1161	-2.58081	5.98662	-3.5056	3.01442	6.94207	5.62758	18.5707	-0.887251	8.10183	5.22828	14.4689	-2.44076	0.998318	12.5392	4.25806	1.38357	14.2572	14.6236	-2.74744
3	-3.8714	-0.431125	5.71305	0.939156	-9.33162	3.57972	-23.7071	-0.844012	2.46279	9.49875	-5.50298	-5.63271	-10.0245	1.53441	5.70306	-6.33212	-4.75999	9.03974	6.21286	-0.972992	3.34624	-6.04498	-0.455567	-2.13442	3.37045	1.13007	6.84479	-1.94992	-1.76596	0.239966	-7.91163	-2.60254	-0.603547	1.21832	2.12768	-1.34905	15.2721	-5.0165	-1.48825	3.01658	11.4133	-10.0612	-4.75683	3.84338	-1.14792	-3.19104	10.1065	13.5957	-9.69871
3.5	1.37422	-4.17026	2.81697	0.353035	-7.07676	2.13082	-21.0198	-4.69204	-0.199747	4.93336	-6.2495	-0.294642	-11.6919	6.1502	3.73979	-3.62104	-0.0818388	0.661742	-0.568191	-1.07391	1.85205	-8.10858	1.43779	1.51118	-2.99955	2.65957	-4.12912	-6.80235	-9.93251	0.462898	-4.81842	2.20373	2.93256	1.29905	3.38127	-2.70709	8.00033	-9.45782	-3.71806	5.78852	7.84135	-7.56688	-5.25716	1.47828	3.26389	-3.58109	4.22827	5.19213	-7.14038
4	4.68158	-1.43898	1.52125	1.01988	-1.0959	-3.07756	-1.32822	-5.93519	-2.06606	1.21987	-0.749392	0.926711	-5.92221	3.0165	0.347663	0.361432	1.01466	-4.53702	-7.6052	-0.471098	0.137779	-1.0267	6.09406	2.83995	-9.28166	-0.458937	-7.42126	-5.77048	-14.3447	-4.86031	2.17108	2.47512	2.85556	-1.88432	3.83034	-0.234875	-2.73634	-8.0477	0.0891351	2.15276	4.14589	-7.23577	-1.14765	0.777146	6.78346	-0.720725	-0.975814	-0.407675	1.81879
4.5	4.03156	0.670731	0.25721	-1.43429	-0.379879	-7.10836	9.06256	-2.97119	-0.998852	-1.91949	4.41839	1.83954	2.10797	-1.57202	-2.32917	1.94111	0.0487215	-3.598	-5.53864	1.68022	-0.834024	5.86146	4.81206	3.66508	-7.62592	-3.27106	-3.93218	0.43077	-2.48952	-5.98233	8.12213	-1.30935	-0.393385	-5.99059	0.513259	5.74048	-9.18322	1.56265	0.447366	-2.49553	-2.42909	-0.543494	0.610915	-1.68083	0.703457	2.27962	-3.99788	-4.36335	8.8435
5	-0.556317	1.31646	-5.7619	-2.884	4.77019	-2.40616	11.8388	4.38975	1.68901	-6.02934	3.75657	2.73195	9.44664	-4.4541	-1.62848	4.5	1.3254	-1.96993	2.13962	1.11512	-3.49787	6.0436	-2.48436	0.94114	3.41887	-0.975637	1.13256	5.31102	12.1869	1.67856	5.62935	-0.597396	-1.77812	-1.42409	-3.76822	3.43366	-8.43719	10.093	-0.923091	-3.15914	-8.4151	10.1364	2.83736	-2.00383	-4.94196	2.52715	-6.16378	-7.69042	7.62383
5.5	-5.65964	4.05318	-4.54659	2.00622	13.114	6.88153	25.1538	10.0527	-0.887136	-7.70315	4.32692	0.429148	16.084	-4.675	-5.83286	3.15061	2.45305	0.40347	5.35956	-0.277339	-1.00418	3.2752	-9.40398	-6.82293	13.1178	0.915996	7.50521	8.78095	16.3458	8.46121	-3.19251	-0.169562	-3.01307	6.78163	-6.08434	-4.88312	-2.91566	10.8664	5.5929	-5.30319	-12.5564	15.2709	7.71335	-2.41414	-4.66093	2.68607	-3.19731	-6.32635	-1.44704
6	-6.62158	10.4534	7.42872	7.54105	18.0453	13.2401	29.2473	10.6016	-4.88075	-1.66649	5.57148	-5.66522	18.6142	-2.3585	-10.5163	-3.13933	3.19963	1.02221	0.831752	2.40939	4.11234	-0.818162	-12.8914	-6.00445	16.3529	-3.21453	12.318	11.8659	7.60304	10.507	-7.52749	-0.747456	-1.62054	4.81208	-6.12832	-5.56111	1.50684	2.76968	8.67518	-8.91168	-9.68846	22.084	11.8802	-6.22179	-6.53096	-0.49216	-0.753853	-7.4376	-8.81794
6.5	-3.52846	16.524	13.7065	10.2985	11.964	12.4194	32.8608	12.7557	-10.2341	9.52935	3.46997	-10.2047	9.70661	-5.25304	-2.9784	-9.73617	2.009	-2.10844	-3.924	4.58111	2.91629	-2.64864	-13.704	0.0402851	14.4695	-5.89719	10.1304	11.4654	-2.63293	9.94811	-1.30193	1.50635	-2.46015	-2.0633	-4.65045	5.301	-1.09288	-5.5372	4.58717	-10.7474	1.1712	25.7653	9.7022	-10.8756	-5.96722	-9.96782	-0.0515332	-8.09682	-5.46282
7	-0.733955	23.1881	10.7518	8.18844	-0.557632	8.31162	47.9232	17.9007	-8.2375	12.1143	-1.34954	-4.48952	-1.53075	-5.89581	5.43674	-10.6791	0.779244	-0.107908	2.09116	0.567434	-2.3429	-2.40346	-15.959	-0.213034	8.40048	-2.74109	8.58051	16.4822	-4.26707	4.63005	14.1233	-0.531249	-13.0919	-4.92492	1.692	14.6636	-15.2457	-9.53047	1.27576	-12.4072	6.41235	22.7702	0.873475	-13.5922	-0.868084	-10.0662	1.03145	-3.28829	0.522758
7.5	2.78174	33.9447	9.30462	6.14915	-7.67229	14.4819	69.8848	15.4143	2.16279	6.90851	-5.64002	0.765228	-5.11626	-4.37969	8.05389	-4.824	-1.08691	6.76325	7.90579	-7.23189	-5.96072	5.84391	-20.119	-1.31267	10.0253	1.03322	9.48451	24.521	-4.16517	0.27227	42.5715	-3.90708	-23.5014	-4.27791	12.6456	14.1918	-20.3396	-4.94654	-0.521326	-13.0706	4.95742	19.9852	-9.49311	-14.8971	-1.30252	1.09409	2.70531	-1.47732	8.21676
8	7.15567	52.7031	15.9696	8.03023	-8.55504	43.3227	90.5116	4.96696	6.97003	8.47264	-4.7252	1.18644	-2.0768	-7.12931	6.45701	-1.6041	-5.88742	21.5618	4.47845	-5.92429	0.872872	24.9906	-19.1921	-0.067781	19.6492	13.3948	1.06633	22.205	-1.82741	1.21031	84.8477	5.0017	-26.4644	-5.18194	13.064	8.4152	-7.38139	17.5128	1.17897	-9.40262	7.01771	21.8984	-11.5129	-12.022	-7.67201	22.1063	7.01598	-2.00463	27.4149
8.5	8.46487	88.2333	26.1588	11.9356	-6.5367	90.8519	116.727	-1.48989	1.68387	14.0268	-2.79052	2.00096	4.23471	-9.95459	2.28839	-0.635501	-9.07214	58.1336	2.43942	1.68428	25.6312	52.9089	-12.5469	-1.26418	26.0341	40.4788	-6.70262	13.3793	5.24263	15.6717	134.412	23.5641	-29.568	-2.58792	14.3688	9.11152	3.62978	64.3492	12.7114	-6.17982	8.90695	24.4735	-6.46512	-9.93391	-11.4283	57.7881	12.9965	3.5048	62.7893
9	9.69056	135.409	44.127	13.9636	2.81495	147.811	160.142	-0.102691	-3.92808	14.981	0.473759	8.4577	30.8333	-5.06606	2.83563	-3.35469	-4.52717	113.913	7.29927	8.8433	76.141	99.6804	-5.25608	-7.37202	38.2589	87.1158	0.741759	10.3514	12.4516	54.3799	190.194	49.403	-25.6248	1.7255	44.5472	16.895	3.48611	128.019	27.7346	-2.27436	10.3416	26.056	1.70268	-12.2667	-8.20749	100.308	28.5148	12.6512	115.637
9.5	11.8513	189.868	86.2589	22.3978	12.0321	205.85	217.284	3.76274	-5.64621	12.8786	8.40618	26.5565	84.515	4.91693	9.43265	-7.44202	4.30295	167.764	10.5651	23.7778	140.737	166.193	7.5594	-10.504	71.4111	143.362	10.3596	11.16	14.9781	120.172	238.374	86.5986	-10.339	0.310097	102.572	17.5825	2.4495	187.072	48.0149	1.3454	14.9473	29.6237	17.5737	-12.7635	-6.08698	151.578	65.1271	28.0861	177.767
10	14.327	242.733	154.715	43.2268	14.49	259.856	286.046	5.84012	1.14022	15.7471	13.8797	57.9915	149.754	16.2442	15.5938	-4.87906	6.10312	209.505	3.27448	60.6092	204.678	230.541	41.8896	-7.9646	127.587	197.736	17.2765	7.79751	21.07	203.952	272.749	134.159	13.7054	2.51537	169.058	17.2717	5.54786	238.449	82.522	4.50836	23.8653	39.7876	58.1658	-5.97272	-3.51991	199.024	117.61	56.904	233.196
10.5	25.1778	280.4	226.44	78.5092	16.7159	302.588	350.635	8.7732	23.3535	19.9968	25.3897	100.79	212.991	18.5693	14.8848	-1.11987	1.83142	243.984	-6.76343	114.155	264.514	277.986	94.9767	-9.99716	191.918	246.131	22.2957	7.03714	49.2481	279.281	310.453	182.013	28.5147	19.0991	233.016	19.9216	6.5795	289.365	131.003	12.4759	29.1249	71.1817	122.018	14.6244	6.40412	241.973	169.937	100.002	273.428
11	50.1951	301.695	281.601	129.895	20.2664	333.015	405.719	14.3285	60.5966	18.2352	53.9805	149.59	269.175	16.5123	12.539	-1.10368	1.20169	275.205	-7.59823	166.263	313.48	314.023	151.375	-8.98482	247.232	278.466	16.1204	10.3659	95.1721	336.534	351.421	222.04	21.0473	48.4191	290.95	23.2008	-0.254828	333.357	192.904	30.6799	32.8361	111.626	190.383	43.3699	17.3883	279.355	220.033	151.724	303.128
11.5	86.9592	319.62	322.199	187.396	25.5331	356.955	440.873	18.4375	110.541	17.8533	98.8509	205.224	316.366	21.8176	19.9482	1.67188	1.35366	306.783	3.68476	207.512	350.712	344.214	200.54	1.14142	294.688	305.649	11.5737	14.7635	145.744	378.835	382.696	256.063	14.9891	96.9102	336.133	19.3743	-4.23143	364.635	253.162	64.4993	36.1905	151.182	244.539	82.7887	16.0415	312.512	262.187	195.159	327.951
12	128.605	345.222	354.458	236.459	25.0686	379.239	474.392	17.01	170.065	21.9431	148.865	263.649	353.541	43.6784	26.2268	11.6202	1.56101	342.007	21.2652	240.528	382.937	366.135	238.614	7.77393	335.905	337.649	18.5469	25.4281	191.277	411.531	405.699	292.435	30.8152	160.998	367.405	18.4865	7.5257	394.385	296.799	108.324	34.0692	198.044	286.298	131.994	4.41817	342.108	291.178	231.124	350.767
12.5	170.359	373.623	386.463	274.533	22.1014	405.071	518.291	10.6084	228.659	21.8304	194.824	307.332	385.566	83.4361	21.8518	22.6811	8.97967	378.493	36.9187	270.944	412.539	391.452	269.696	11.9444	360.127	373.348	23.5907	43.7016	234.913	436.342	427.924	326.852	39.4653	221.907	389.08	35.3241	22.4631	426.265	323.078	160.409	24.3438	253.091	324.776	179.073	-2.33589	368.194	318.09	265.253	366.852
13	204.002	402.062	414.307	301.715	22.236	430.702	556.308	9.93021	282.583	22.9209	229.014	336.952	416.526	135.957	22.2954	22.2397	16.4065	411.124	33.9345	308.882	430.321	422.368	294.774	24.3552	372.828	402.42	16.9985	73.5015	282.445	452.393	445.166	350.922	28.0101	269.618	424.085	57.0394	22.9623	458.987	345.592	219.594	19.4638	285.382	365.532	222.464	4.11411	386.893	349.367	296.531	381.473
13.5	234.003	429.283	435.498	328.311	24.726	452.534	590.046	27.1626	330.647	26.9914	252.602	364.589	442.581	195.462	27.6625	12.78	16.0609	440.87	26.8672	343.993	443.316	451.757	321.368	39.9498	390.742	422.56	15.4471	122.866	326.558	472.159	461.113	370.052	14.9485	309.614	464.686	86.4152	19.9574	482.673	371.036	273.823	21.5244	301.834	401.853	258.304	15.3391	403.967	385.973	320.638	405.663
14	260.728	458.175	454.07	359.835	24.699	479.187	617.667	64.1731	365.306	35.5824	280.377	388.005	462.779	246.06	32.4348	8.78254	10.3264	461.687	33.8537	366.221	461.383	475.843	347.289	61.1667	409.261	438.275	36.4955	184.244	351.219	497.081	476.866	394.906	12.8697	345.56	490.085	140.46	21.2895	502.97	401.011	311.747	20.8019	332.792	422.64	285.107	25.4772	425.548	415.788	337.707	433.838
14.5	282.615	488.581	472.085	386.218	19.9217	502.966	641.014	113.287	390.591	52.4364	314.83	397.491	486.574	284.901	33.9849	8.95344	4.72544	485.912	49.2792	381.765	477.296	494	368.341	98.7412	427.605	455.572	72.7871	244.062	370.824	519.513	478.613	421.097	18.7146	370.592	506.694	202.331	27.2712	523.022	427.69	339.63	15.6314	369.354	435.696	308.309	36.8432	452.989	425.882	351.341	461.392
15	309.785	509.451	486.246	402.715	20.1048	521.135	668.133	168.198	410.39	83.134	346.494	406.221	513.534	317.12	41.389	9.53613	12.4737	517.597	53.8532	400.607	494.158	504.844	388.313	144.334	450.7	473.706	122	296.119	392.791	539.726	478.102	439.664	20.1875	383.924	527.326	256.928	44.592	533.638	452.238	374.838	15.7867	391.706	457.182	337.774	56.2285	480.798	433.679	369.166	484.365
15.5	343.506	519.853	505.463	413.316	36.955	535.067	698.256	222.513	432.825	126.002	364.99	429.656	538.035	337.313	60.7746	11.8541	39.0799	542.155	48.7418	420.748	514.09	518.113	404.489	196.487	476.443	491.134	181.61	330.947	411.378	566.141	497.883	460.222	11.437	396.786	550.127	299.537	81.8618	541.98	465.98	415.892	21.7888	395.178	484.916	371.075	98.3812	503.908	449.182	388.105	497.022
16	368.687	533.848	528.538	422.624	65.2255	548.281	727.223	263.665	463.191	172.053	376.518	450.751	548.439	355.367	94.2763	14.9946	79.7109	560.885	47.7086	435.756	531.594	540.767	423.904	244.71	496.182	510.409	241.848	346.13	435.89	593.761	526.463	487.775	15.5298	416.855	570.606	324.071	132.331	557.734	476.682	449.639	24.1642	398.956	510.328	397.797	153.567	518.705	468.348	410.956	500.419
16.5	379.767	540.974	548.981	435.54	97.6974	560.269	754.375	300.616	494.013	216.733	389.737	460.795	545.245	382.195	141.863	20.056	127.959	579.097	59.3055	448.795	552.642	557.484	445.662	273.697	504.214	523.649	300.891	361.475	462.793	605.994	546.947	513.854	32.0947	441.361	584.758	345.474	180.884	578.117	491.751	470.941	20.1298	402.201	523.863	418.707	198.463	531.814	492.757	430.31	501.029
17	394.609	551.999	567.04	456.053	134.65	569.076	790.874	339.058	514.316	260.031	401.526	470.758	553.026	409.873	187.575	22.6407	177.791	605.391	70.3513	461.071	569.302	563.805	467.266	291.482	509.717	536.95	357.674	386.644	482.23	605.447	557.533	532.049	37.4997	460.71	593.331	370.669	220.25	594.74	509.611	480.96	17.5487	403.775	534.416	440.808	231.275	544.942	513.879	436.441	515.351
17.5	409.053	566.268	579.871	479.783	174.96	584.63	827.135	371.495	529.39	292.278	416.526	490.106	584.752	432.669	222.774	25.9195	223.582	634.984	66.6402	476.997	569.459	571.11	484.492	313.426	517.512	546.802	398.39	416.054	494.27	612.318	570.542	539.526	33.1725	479.293	607.705	393.691	260.445	607.842	531.22	489.542	21.5021	410.266	546.736	462.602	252.484	553.149	531.943	441.375	529.622
18	420.496	576.423	585.611	495.121	216.347	605.359	835.183	391.048	546.971	311.066	438.844	507.042	608.034	454.673	253.524	30.8478	265.743	658.474	53.3202	490.288	565.124	583.883	496.712	344.349	525.155	550.371	425.735	439.428	511.698	626.376	585.183	547.013	31.6024	498.075	624.632	406.637	306.369	615.964	549.903	508.649	23.8615	411.985	560.078	479.689	266.728	564.1	541.116	450.126	528.659
18.5	439.436	590.83	589.169	495.565	249.223	621.949	819.229	409.601	570.348	333.027	456.445	514.543	613.995	469.79	276.687	36.9723	305.662	667.086	40.9899	495.262	574.898	597.471	513.389	371.746	532.074	558.037	455.638	458.315	528.607	630.821	594.378	555.547	40.4582	509.751	628.133	406.263	341.881	626.472	563.628	533.706	24.9775	404.171	576.082	495.276	284.699	576.722	543.309	452.336	525.803
19	468.724	609.879	589.846	495.155	270.949	631.451	821.921	437.707	591.36	352.94	462.51	520.45	619.187	476.072	291.49	55.5676	342.258	667.181	33.8466	497.065	594.922	608.598	536.355	392.129	536.945	571.637	488.119	475.429	536.664	621.804	599.082	558.274	49.9232	523.811	631.371	407.246	358.923	642.468	572.119	549.019	28.0531	421.519	595.3	513.98	309.967	579.341	556.497	457.553	535.443
19.5	489.407	625.923	588.723	500.06	290.939	637.213	868.621	466.261	609.845	362.932	467.659	533.824	627.651	477.808	309.747	95.2743	369.276	676.883	33.2931	506.302	604.941	623.296	555.193	413.171	540.547	591.476	515.601	488.63	544.568	623.31	606.806	557.922	47.9375	546.657	649.258	422.349	366.245	658.922	578.148	555.301	29.928	452.905	620.538	522.124	336.494	576.401	576.012	479.904	551.365
20	497.08	643.175	603.993	507.92	318.368	640.613	928.306	492.577	631.842	373.375	471.235	552.127	635.096	482.141	325.511	147.951	381.692	691.393	44.7726	520.666	606.677	642.072	563.858	423.224	548.978	601.57	537.499	510.859	561.434	641.146	616.355	569.863	48.1353	562.821	671.032	447.889	375.729	667.272	584.977	564.691	33.139	464.893	637.765	525.556	360.691	583.939	587.771	501.797	561.28
20.5	495.293	659.261	626.565	520.085	343.781	647.783	961.551	513.162	651.55	385.613	482.258	568.026	644.622	495.167	331.288	198.595	396.366	709.712	60.7538	532.149	606.337	659.657	573.622	429.93	556.251	599.759	547.285	540.72	577.479	658.165	626.045	596.101	48.0745	570.361	687.7	468.368	384.551	665.385	591.513	582.224	37.1086	462.375	639.375	541.342	377.819	609.579	594.242	510.135	565.038
21	493.606	667.346	636.192	537.482	361.65	654.981	978.545	529.329	667.713	400.278	495.703	575.137	663.467	510.105	333.152	242.545	422.152	730.984	68.3864	543.358	608.005	666.96	587.414	441.789	559.481	605.112	557.167	557.676	579.748	664.066	635.12	613.246	33.871	580.017	696.706	479.006	393.899	660.193	597.868	595.042	34.0229	464.514	637.639	564.376	393.122	634.105	600.573	519.133	565.929
21.5	505.848	673.098	633.661	556.276	375.262	665.369	998.898	544.084	688.284	415.444	504.969	571.286	670.041	516.684	330.637	286.12	451.467	751.503	70.6579	559.799	614.462	667.062	603.545	456.284	561.722	611.906	578.258	569.032	582.785	660.672	646.897	627.365	21.0151	590.794	700.39	483.059	406.847	664.334	609.474	604.342	28.0572	469.882	642.842	578.701	415.225	647.291	610.801	530.957	569.332
22	521.929	676.431	627.66	565.224	386.006	679.944	1021.3	553.751	704.383	424.604	509.728	563.103	659.569	518.899	333.036	323.83	470.399	764.609	61.3791	573.421	627.447	668.635	622.342	471.6	571.625	619.233	602.908	576.896	588.992	660.431	655.316	641.377	20.4136	600.571	715.543	492.003	413.653	671.165	621.059	615.109	30.604	466.112	652.454	591.943	434.594	654.051	618.949	536.747	576.791
22.5	531.619	681.382	629.191	567.379	396.888	691.843	1054.81	565.532	711.925	432.214	513.89	563.71	660.365	528.661	351.97	358.003	481.406	778.637	50.3241	571.079	630.845	669.108	638.199	488.087	589.266	629.376	611.177	580.247	594.766	662.143	652.367	655.864	27.1585	613.533	733.181	500.442	418.441	683.24	628.65	623.14	51.1633	458.016	663.326	603.707	444.074	655.854	626.23	536.741	581.303
23	540.76	689.765	641.396	568.037	403.818	698.43	1090.59	586.029	719.433	442.433	524.474	571.161	672.678	551.145	373.403	388.283	490.004	796.278	58.5145	560.003	627.6	678.407	646.628	507.465	605.84	640.457	616.019	584.017	612.093	665.819	655.651	666.422	36.1675	623.642	743.648	502.677	423.382	697.851	633.394	631.104	92.6966	467.581	676.266	610.968	449.722	661.805	632.135	542.229	579.602
23.5	554.741	696.739	654.275	580.798	400.718	697.793	1105.91	608.508	731.935	445.975	540.016	571.879	678.027	567.839	381.966	412.932	503.726	804.428	81.5259	560.076	630.59	686.625	656.504	529.271	608.614	647.787	622.307	594.194	632.908	670.112	668.538	665.485	39.7396	628.182	752.673	498.718	425.201	706.444	634.579	640.033	146.788	488.313	685.462	619.783	458.163	680.434	637.876	556.054	576.982
24	569.529	703.651	660.744	600.984	404.078	689.959	1118.6	617.951	752.017	448.045	548.221	573.379	668.943	565.878	382.854	436.312	524.101	814.256	106.545	570.306	635.29	693.747	667.644	540.811	605.047	653.699	628.021	616.48	645.49	677.331	673.874	659.741	43.437	632.127	757.677	506.975	432.443	704.121	636.788	650.703	208.503	523.113	684.023	626.125	471.883	698.931	648.592	569.649	579.593
24.5	587.03	715.453	660.739	610.969	417.125	692.916	1131.53	620.796	768.059	459.445	555.747	585.4	661.262	562.123	381.584	455.811	537.938	832.716	143.84	587.276	638.359	711.606	674.396	548.585	605.369	661.154	641.727	638.929	648.895	689.026	678.488	658.604	60.6316	642.069	760.298	524.071	452.201	704.462	646.432	663.917	264.637	534.448	682.006	634.615	491.72	704.472	663.716	578.546	587.883
25	600.555	731.054	670.737	611.317	426.468	710.321	1148.37	627.491	777.429	467.604	562.241	600.637	665.557	563.249	390.505	465.508	546.838	845.817	184.803	601.948	643.362	731.059	679.456	560.912	612.759	670.346	657.089	653.404	655.035	697.763	684.792	664.486	86.5852	655.994	757.863	530.201	463.221	714.493	650.994	678.341	320.118	515.549	683.778	647.848	506.571	703.965	681.797	583.225	595.112
25.5	610.611	745.39	681.751	615.533	431.444	725.683	1167.2	642.791	786.089	465.026	563.591	609.945	676.596	570.316	403.753	479.834	562.057	848.708	210.274	597.971	644.267	746.108	690.329	567.448	623.174	671.924	668.972	662.518	663.729	701.784	689.935	682.147	122.355	669.232	757.828	531.236	462.686	726.743	651.996	686.806	362.291	496.344	698.649	655.024	509.507	703.461	701.28	581.346	597.835
26	615.107	755.828	683.901	621.305	435.15	722.985	1181.96	663.957	798.243	470.707	570.454	613.503	688.378	579.651	411.494	496.816	578.682	851.463	223.614	583.695	641.237	750.438	710.646	567.281	626.91	669.608	687.187	670.54	661.009	705.301	688.499	704.88	172.947	678.54	761.011	531.066	463.32	726.938	657.741	687.361	377.474	490.912	717.539	652.98	509.332	711.824	712.469	584.912	600.546
26.5	609.915	765.416	684.148	626.349	440.584	714.099	1182.77	684.557	807.416	484.366	571.092	612.841	702.298	582.452	417.509	505.793	586.38	857.548	237.727	585.349	641.591	750.548	737.365	569.372	622.972	670.66	710.477	675.29	653.288	705.974	687.573	720.785	217.802	687.181	768.411	534.883	461.766	716.764	666.658	686.927	386.154	475.468	726.526	658.163	524.652	720.715	711.254	596.976	608.433
27	615.061	771.321	685.411	627.064	447.801	720.994	1173.03	699.542	809.666	493.681	568.42	616.866	713.862	576.595	419.104	514.191	593.881	867.12	259.736	598.65	656.734	749.604	750.375	581.867	623.918	667.209	723.838	672.475	647.274	704.135	689.222	722.38	238.682	693.009	784.886	546.947	457.027	708.223	678.555	698.485	402.156	437.915	726.58	679.465	549.804	729.867	710.046	609.418	614.304
27.5	634.996	775.584	686.52	627.369	451.983	735.998	1186.87	708.458	812.694	495.234	577.137	618.769	720.44	576.054	415.683	526.101	607.348	878.833	279.638	615.62	668.264	748.161	750.717	601.949	630.457	665.291	733.197	663.755	647.868	710.38	703.036	713.889	248.676	698.312	797.463	553.571	455.185	712.598	689.724	715.304	424.905	433.337	731.19	699.576	565.857	737.039	718.241	615.867	609.989
28	655.613	784.209	695.313	635.141	456.053	743.179	1217.37	714.752	827.96	497.279	585.794	618.543	722.269	578.834	418.516	539.093	618.227	884.231	292.764	624.002	666.452	760.179	752.628	620.827	635.402	675.108	754.679	669.097	659.281	727.141	715.566	705.151	259.384	703.806	800.215	547.339	460.308	723.832	690.669	732.274	450.935	470.003	736.734	703.755	569.063	739.126	735.001	621.76	607.346
28.5	664.42	786.055	705.021	647.972	453.434	744.086	1240.17	720.028	839.337	507.582	591.95	621.536	727.694	584.519	426.674	552.157	619.659	885.625	301.063	618.668	661.526	774.41	762.039	631.674	637.404	690.261	773.17	686.985	671.023	741.042	712.736	708.76	272.426	710.365	798.516	544.389	461.341	722.934	692.657	737.289	477.567	498.581	747.894	701.668	573.663	738.101	738.288	628.556	611.194
29	661.33	790.749	706.829	657.377	459.567	746.752	1258.04	723.875	850.204	519.782	600.562	629.466	732.707	586.43	437.855	568.501	624.215	899.679	303.393	611.838	653.114	779.46	773.822	644.585	638.788	697.53	779.166	700.414	677.172	742.656	708.306	726.756	295.178	718.209	804.852	554.238	461.175	718.647	697.46	730.125	502.011	499.904	765.622	709.94	583.856	736.477	733.566	633.647	612.436
29.5	665.014	806.363	705.342	660.924	468.18	747.525	1274.07	730.908	865.906	529.624	606.995	639.638	731.432	584.044	451.225	578.229	633.012	913.39	301.743	612.414	646.729	785.626	778.677	659.378	637.04	704.429	776.052	699.549	685.454	735.027	711.094	736.375	313.447	725.677	822.782	565.69	466.763	714.944	698.522	736.199	520.626	489.636	774.326	730.378	587.112	745.128	743.48	636.884	605.872
30	674.196	817.237	710.944	657.93	466.108	748.597	1279.06	739.365	877.747	534.957	612.966	646.965	735.104	587.725	455.855	580.254	645.207	919.297	303.863	620.58	659.652	791.093	780.515	667.494	635.666	708.535	763.739	696.207	699.011	718.445	711.166	743.249	321.641	728.683	832.512	567.409	475.47	709.96	698.472	752.818	538.842	487.021	769.236	744.148	588.412	757.556	756.034	638.555	599.838
30.5	678.545	821.033	712.173	658.462	463.078	757.521	1275.49	750.856	884.371	529.36	613.16	647.005	749.288	592.861	453.219	588.301	659.416	920.76	318.495	625.85	675.358	789.084	788.088	672.107	642.049	708.847	764.353	703.607	709.661	706.462	713.299	754.343	332.559	725.518	829.86	563.426	477.529	709.713	700.314	758.274	552.838	488.619	762.3	744.335	595.595	764.762	753.946	639.389	604.52
31	679.892	825.376	709.828	677.933	468.036	768.744	1288.29	757.415	891.134	521.092	604.055	644.929	758.721	594.656	452.41	599.334	669.823	920.375	326.725	623.094	671.654	787.648	797.545	675.495	647.943	714.548	783.126	708.131	712.278	706.06	720.255	764.186	351.667	728.742	833.451	557.413	473.523	712.185	698.551	756.504	564.485	485.568	765.389	742.261	604.12	775.582	752.836	643.905	614.884
31.5	680.16	832.228	710.175	688.233	475.65	771.06	1318.09	758.923	898.19	519.56	596.788	649.94	763.892	601.706	457.321	608.836	670.04	918.13	320.546	620.832	664.884	788.159	803.567	679.314	653.229	727.135	803.921	700.218	708.477	709.227	729.325	764.329	373.818	741.978	845.892	557.754	472.588	721.152	695.642	764.951	573.633	488.885	771.615	749.2	612.183	791.888	762.517	655.731	628.941
32	687.92	834.887	708.317	672.424	483.631	766.921	1340.89	768.468	903.557	520.503	597.916	656.185	768.579	618.776	465.176	617.262	670.966	920.667	327.491	619.914	662.053	786.694	805.95	686.466	658.687	736.253	815.471	695.072	707.389	716.449	739.306	760.974	392.18	747.956	855.877	568.525	480.078	726.358	698.243	776.378	576.602	496.127	775.53	761.052	622.644	802.586	772.498	663.606	623.544
32.5	697.152	832.33	711.236	665.98	489.976	773.124	1354.43	780.488	908.236	519.61	608.852	658.559	780.394	629.931	464.44	624.78	680.829	933.912	347.024	624.189	667.917	780.842	813.154	691.346	661.033	735	818.565	698.934	710.789	727.344	748.945	755.45	399.699	743.927	860.517	577.627	487.858	720.294	701.167	785.489	586.166	496.538	780.997	770.498	636.433	796.179	779.938	671.989	608.617
33	697.93	834.397	715.574	680.774	499.251	781.177	1368.61	786.172	913.922	521.965	617.231	663.757	782.806	633.602	462.56	636.624	688.454	950.381	352.437	630.331	677.338	781.037	823.539	700.346	659.156	728.555	820.839	707.322	708.024	732.204	755.082	747.878	399.417	744.014	860.571	579.191	493.406	716.272	703.154	788.527	604.475	474.702	793.017	782.061	648.756	779.589	783.506	681.613	608.938
33.5	695.979	841.537	725.105	695.928	502.69	782.805	1382.78	791.994	917.335	533.484	621.163	671.961	774.649	642.077	466.753	650.116	692.556	961.719	347.896	635.272	673.735	785.702	822.82	711.803	660.269	733.094	819.267	717.495	699.031	728.582	761.443	745.844	405.726	749.259	849.406	578.375	501.226	717.124	706.907	787.296	612.659	452.663	801.4	790.316	659.848	771.948	785.379	683.402	612.472
34	700.06	855.34	741.265	697.638	494.494	787.553	1389.73	800.421	916.284	550.543	631.178	677.676	771.712	646.996	469.361	654.721	707.543	968.864	356.804	642.695	660.981	788.269	826.405	725.236	666.945	745.774	816.911	732.267	693.743	732.428	759.749	750.629	410.141	751.979	833.812	572.776	508.721	724.155	708.945	794.638	612.539	453.608	802.647	786.171	661.739	783.61	787.13	689.464	605.624
34.5	712.59	873.257	753.326	696.319	493.15	784.984	1399.15	803.927	912.359	562.479	635.138	670.98	777.108	637.802	473.436	649.675	723.934	972.183	371.413	651.826	657.699	793.008	843.448	730.825	665.638	750.599	819.031	740.748	704.627	747.913	752.547	758.834	402.775	745.919	833.887	568.231	512.943	736.823	702.641	805.358	618.233	471.682	806.709	785.556	652.546	802.924	790.092	690.97	606.386
35	729.556	878.147	749.858	700.336	500.128	773.415	1420.58	802.83	915.55	555.739	633.128	662.868	777.234	623.535	478.599	644.131	733.515	969.637	373.758	659.042	667.933	798.868	856.271	725.105	662.636	752.986	830.165	739.748	727.86	747.824	753.167	761.797	401.511	740.606	847.509	579.265	512.212	749.653	702.039	817.667	634.307	483.429	812.472	795.069	650.931	816.664	796.717	685.613	616.054
35.5	738.519	876.474	748.409	699.932	507.135	767.416	1431.9	801.209	926.671	547.398	635.883	662.262	773.889	618.398	483.359	642.477	743.131	970.192	381.257	665.511	673.968	797.607	854.12	724.584	670.214	759.256	845.818	736.579	743.253	735.863	760.805	760.386	413.455	745.299	860.809	592.753	509.433	751.549	713.098	820.66	651.821	494.689	815.04	807.2	661.889	822.745	802.658	682.854	620.808
36	744.8	883.766	761.998	694.121	510.096	765.013	1436.61	803.737	937.846	552.074	637.879	662.921	769.928	624.842	493.509	646.636	742.725	982.448	404.806	665.183	672.031	796.052	853.659	730.654	680.133	765.244	856.827	739.368	741.72	734.177	759.617	765.898	431.265	761.759	877.599	596.529	511.437	745.654	722.789	812.304	660.496	491.918	814.9	816.058	683.315	826.825	803.64	688.196	626.627
36.5	753.51	892.619	774.032	693.127	513.691	762.061	1432.63	809.309	952.327	556.325	638.86	667.624	763.88	634.721	508.865	652.877	734.959	993.816	420.615	659.658	670.291	796.538	857.358	734.729	688.193	768.649	861.508	749.095	737.89	732.423	748.304	776.247	441.205	780.223	888.105	602.416	518.928	745.567	722.414	805.988	661.799	471.785	820.508	827.422	698.08	835.102	800.689	694.745	639.693
[truncated: 51 more columns]
