# Supplementary material for: Surfactant-enhanced DNA accessibility to nuclease accelerates phenotypic β-lactam antibiotic susceptibility testing of Neisseria gonorrhoeae
Source: PLoS Biol. 2020 Mar 19;18(3):e3000651. doi: 10.1371/journal.pbio.3000651 (PMC7081974; doi:10.1371/journal.pbio.3000651)
Supplement: S7 Table — The data are summarized with the mean percentage accessibility calculated from the technical replicate nuc-aASTs (mean percentages accessibility are shown in Fig 5D). Additionally, the SEM and SD are reported from the technical replicate nuc-aASTs. The technical replicates in this table are only the replicates that met our criteria for inclusion as described in the Methods. ABXs included PEN and CRO. ABX, antibiotic; CRO, ceftriaxone; nuc-aAST, nuclease-accessibility antimicrobial susceptibility testing; PEN, penicillin; SD, standard deviation; SEM, standard error of the mean. (XLSX) [file pbio.3000651.s011.xlsx]

## Sheet: Sheet1
AHF_ID (internal #)	Sample Number	ABX	Sample Type	Mean % Accessibility	SEM	SD	Technical replicates
78	1	PEN	Clinical sample	82.8	1.39	1.96	3
78	1	PEN	isolate	78.3	1.68	2.38	3
78	1	CRO	Clinical sample	70.09	2.24	3.17	3
78	1	CRO	isolate	73.69	1.16	1.64	3
84	2	PEN	Clinical sample	48.57	2.66	3.76	3
84	2	PEN	isolate	46.92	5.75	8.13	3
84	2	CRO	Clinical sample	50.77	9.44	13.34	3
84	2	CRO	isolate	42.99	1.91	2.7	3
88	3	PEN	Clinical sample	10	19.02	26.9	3
88	3	PEN	isolate	5.3	1.54	2.18	3
93	4	PEN	Clinical sample	-21.89	10.44	14.77	2
93	4	PEN	isolate	9.95	5.54	7.84	3
