# Supplementary material for: Surfactant-enhanced DNA accessibility to nuclease accelerates phenotypic β-lactam antibiotic susceptibility testing of Neisseria gonorrhoeae
Source: PLoS Biol. 2020 Mar 19;18(3):e3000651. doi: 10.1371/journal.pbio.3000651 (PMC7081974; doi:10.1371/journal.pbio.3000651)
Supplement: S8 Table — Data are plotted in S1 Fig. Mean Cq is computed from qPCR triplicates. Error bars are 98% confidence intervals for three PCR replicates [55]. Cq, quantitation cycle; qPCR, quantitative PCR. (XLSX) [file pbio.3000651.s012.xlsx]

## Sheet: Sheet1
Sample ID	Sample Name	Duration Extraction	mean Cq	PCR error
A	No DNaseI	10	23.08	0.137179
B	DNaseI (10min)	10	23.2367	0.12098
C	DNaseI (7min)	7	23.28	0.104772
D	DNaseI (5min)	5	23.21	0.14278
E	DNaseI (3min)	3	23.2133	0.286474
F	DNaseI (2min)	2	23.2467	0.0228631
