# Supplementary material for: Surfactant-enhanced DNA accessibility to nuclease accelerates phenotypic β-lactam antibiotic susceptibility testing of Neisseria gonorrhoeae
Source: PLoS Biol. 2020 Mar 19;18(3):e3000651. doi: 10.1371/journal.pbio.3000651 (PMC7081974; doi:10.1371/journal.pbio.3000651)
Supplement: S11 Table — Replicate numbers refer to which biological replicate experiment the data are from. The PCR Cq is measured by qPCR (see Methods) and the mean of the PCR triplicates is reported. Eq 1 is used to calculate the percentage accessibility, and Eq 3 is used to calculate the percentage lysis. “Treated” indicates the isolate was exposed to an ABX; “control” indicates no ABX exposure. Data are used to calculate mean percentage accessibility for each isolate, which are plotted in Fig 4A–4C and S3 Fig and shown in S4 Table. ABXs included PEN, CRO, and CFM. Susceptibility was indicated by S, R, or I. ABX, antibiotic; CFM, cefixime; CHAPS, 3-[(3-Cholamidopropyl)dimethylammonio]-1-propanesulfonate; Cq, quantitation cycle; CRO, ceftriaxone; I, intermediate MIC; MIC, minimum inhibitory concentration; Ng, N. gonorrhoeae; nuc-aAST, nuclease-accessibility antimicrobial susceptibility testing; PEN, penicillin; qPCR, quantitative PCR; R, resistant to ABXs; S, susceptible to ABXs. (XLSX) [file pbio.3000651.s015.xlsx]

## Sheet: Sheet1
Isolate	Replicate	ABX	Susceptibility	Cq control (-CHAPS)	Cq control (+CHAPS)	Cq treated (+CHAPS)	% Accessibility	% Lysis
15	1	PEN	S	19.4967	19.3033	21.62	79.9269	-14.3402
15	2	PEN	S	19.2	20.075	21.64	66.2022	45.4746
15	3	PEN	S	18.725	19.64	20.83	56.1697	46.9656
15	4	PEN	S	18.56	19.69	20.635	48.057	54.3084
15	5	PEN	S	18.675	19.91	21.17	58.2456	57.5158
16	1	PEN	S	19.32	20.18	21.3333	55.0415	44.9047
16	2	PEN	S	20.92	21.975	23.615	67.9144	51.8703
16	3	PEN	S	22.2914	22.6031	24.122	65.1059	19.431
165	1	PEN	R	21.82	21.8767	22.1767	18.7748	3.85169
165	2	PEN	R	22.0467	22.5267	22.84	19.522	28.3022
165	3	PEN	R	20.68	20.5967	20.48	-8.42269	-5.94631
166	1	PEN	R	21.3533	21.51	21.3333	-13.0269	10.2905
166	2	PEN	R	22.2933	22.53	22.8433	19.522	15.1296
166	3	PEN	R	21.26	21.0433	20.9467	-6.93	-16.2046
17	1	PEN	S	19.1333	20.7567	25.18	95.3394	67.5415
17	2	PEN	S	22.1855	23.0343	27.6569	95.9405	44.4768
17	3	PEN	S	20.18	20.5467	26	97.7176	22.4428
17	4	PEN	S	21.39	22.68	25.82	88.656	59.1049
172	1	PEN	R	23.0167	23.5	23.5067	0.461032	28.4677
172	2	PEN	R	21.0167	21.0667	21.0167	-3.52649	3.40637
172	3	PEN	R	21.1367	21.2433	21.25	0.461032	7.12686
174	1	PEN	R	27.3133	27.4733	27.7233	15.9104	10.4975
174	2	PEN	R	26.34	26.7833	26.6267	-11.4709	26.4567
174	3	PEN	R	23.3733	23.3033	23.13	-12.7661	-4.97167
176	1	PEN	R	21.51	21.6	21.4367	-11.9872	6.04773
176	2	PEN	R	21.9533	22.17	22.1567	-0.92848	13.9449
176	3	PEN	R	21.8133	21.5267	21.4033	-8.92487	-21.9819
18	1	PEN	R	19.1933	19.51	19.6833	11.3209	19.7077
18	2	PEN	R	22.0469	22.6433	22.7576	7.62148	33.8572
18	3	PEN	R	19.8667	20.13	20.2767	9.66648	16.6839
19	1	PEN	R	19.895	20.985	21.245	16.4912	53.0239
19	2	PEN	R	21.7425	22.9219	23.3842	27.4196	55.8446
19	3	PEN	R	22.2791	23.1675	23.7255	32.0772	45.9791
19	4	PEN	R	21.46	22.1467	22.3	10.0829	37.8712
191	1	PEN	R	24.4867	24.83	24.8067	-1.63049	21.1782
191	2	PEN	R	21.31	21.14	20.9633	-13.0269	-12.5058
20	1	PEN	S	19.05	20.1	24.06	93.5743	51.7032
20	2	PEN	S	20.74	21.925	25.63	92.332	56.0175
20	3	PEN	S	22.7363	23.8146	29.6546	98.2542	52.6435
41	1	PEN	R	19.1167	19.1233	19.3967	17.2594	0.461032
41	2	PEN	R	22.4217	22.6507	22.4685	-13.4665	14.678
41	3	PEN	R	19.3567	20.1267	19.8033	-25.1218	41.3583
41	4	PEN	R	21.3967	21.3667	21.5133	9.66648	-2.10121
44	1	PEN	R	19.4533	19.97	20.1633	12.5417	30.1015
44	2	PEN	R	20.675	21.16	21.285	8.2996	28.5503
44	3	PEN	R	22.3481	22.8496	23.0512	13.0419	29.362
44	4	PEN	R	21.42	22.0567	22.3233	16.8762	35.6803
2	1	PEN	I	19.9667	20.8933	25.1067	94.6091	47.3928
2	2	PEN	I	21.7327	22.2774	26.1843	93.3335	31.4462
2	3	PEN	I	20.0967	20.9433	24.8167	93.1764	44.3932
4	1	PEN	I	19.5167	21.6533	21.8267	11.3209	77.2595
4	2	PEN	I	19.58	20.9167	22.58	68.4291	60.4066
4	3	PEN	I	22.1821	22.6929	24.037	60.6094	29.8201
4	4	PEN	I	20.0433	20.7033	21.79	52.9152	36.7122
5	1	PEN	I	20.1133	21.1867	22.1667	49.302	52.478
5	2	PEN	I	21.9904	23.2589	24.4917	57.452	58.4906
5	3	PEN	I	20.4533	20.6367	21.62	49.419	11.9334
12	1	PEN	I	20.6633	21.2133	21.9733	40.9504	31.698
12	2	PEN	I	22.2588	22.994	24.094	53.3479	39.9268
12	3	PEN	I	20.67	20.6967	21.77	52.478	1.83141
30	1	PEN	I	19.88	19.9667	20.16	12.5417	5.8304
30	2	PEN	I	21.4333	21.1233	21.21	5.8304	-23.9708
30	3	PEN	I	20.6067	20.5133	20.5067	-0.463167	-6.68322
175	1	PEN	I	20.6633	21.5933	24.69	88.3101	47.5142
175	2	PEN	I	20.33	21.31	24.1333	85.8716	49.302
175	3	PEN	I	20.8833	21.7067	23.5033	71.2161	43.4865
179	1	PEN	I	20.5467	21.2567	22.67	62.4557	38.868
179	2	PEN	I	19.6233	20.24	29.8533	99.8723	34.7824
179	3	PEN	I	20.9633	21.1467	22.1033	48.4754	11.9334
12	1	CRO	S	20.485	21.175	22.395	57.0717	38.0146
12	2	CRO	S	22.2588	22.994	24.5825	66.7494	39.9268
12	3	CRO	S	22.885	22.9626	24.3746	62.4206	5.2362
15	1	CRO	S	20.44	20.97	21.28	19.3358	30.7445
15	2	CRO	S	19.83	19.83	20.74	46.7815	0
15	3	CRO	S	19.5133	20.0833	21.76	68.7195	32.6383
15	4	CRO	S	20.0967	20.22	20.6367	25.0846	8.1936
15	5	CRO	S	20.42	20.13	20.975	44.3289	-22.264
15	6	CRO	S	19.4967	19.3033	20.9567	68.2095	-14.3402
15	7	CRO	S	18.56	19.69	20.525	43.9417	54.3084
15	8	CRO	S	18.725	19.64	20.945	59.5279	46.9656
15	9	CRO	S	18.675	19.91	21.225	59.8075	57.5158
15	10	CRO	S	19.2	20.075	21.51	63.0153	45.4746
16	1	CRO	S	20.67	20.89	21.425	30.9841	14.1435
16	2	CRO	S	19.93	20.46	21.155	38.2291	30.7445
16	3	CRO	S	19.225	19.495	20.735	57.6627	17.068
16	4	CRO	S	19.32	20.18	20.71	30.7445	44.9047
16	5	CRO	S	20.92	21.975	22.405	25.7738	51.8703
16	6	CRO	S	22.2914	22.6031	23.4248	43.4239	19.431
17	1	CRO	S	19.45	20.095	22.86	85.2887	36.0507
17	2	CRO	S	21.275	21.575	24.81	89.3789	18.7748
17	3	CRO	S	19.1333	20.7567	24.84	94.1008	67.5415
17	4	CRO	S	21.39	22.68	25.91	89.3421	59.1049
18	1	CRO	S	19.89	20.155	19.865	-22.264	16.7801
18	2	CRO	S	18.925	19.255	19.21	-3.16832	20.4464
18	3	CRO	S	19.32	19.535	19.725	12.3394	13.8454
18	4	CRO	S	18.93	19.475	19.33	-10.5731	31.4609
18	5	CRO	S	20.13	20.16	20.255	6.37278	2.05797
18	6	CRO	S	19.1933	19.51	19.7367	14.5393	19.7077
19	1	CRO	S	19.095	19.495	20.66	55.4036	24.2142
19	2	CRO	S	19.785	20.095	21.43	60.3608	19.3358
19	3	CRO	S	20.505	20.46	22.365	73.2984	-3.16832
19	4	CRO	S	19.265	19.83	20.31	28.3022	32.4045
19	5	CRO	S	20.3467	20.7133	21.64	47.3928	22.4428
19	6	CRO	S	19.895	20.985	22.06	52.5329	53.0239
19	7	CRO	S	21.7425	22.9219	24.1041	55.9312	55.8446
19	8	CRO	S	21.46	22.1467	22.7	31.8556	37.8712
2	1	CRO	S	19.53	19.945	23.085	88.656	24.9981
2	2	CRO	S	18.57	19.115	22.485	90.3277	31.4609
2	3	CRO	S	20.065	20.16	23.88	92.4113	6.37278
2	4	CRO	S	19.11	19.445	22.37	86.833	20.7216
2	5	CRO	S	20.04	19.565	22.86	89.8116	-38.9918
2	6	CRO	S	19.94	20.875	24.86	93.6847	47.6958
2	7	CRO	S	21.7327	22.2774	26.3315	93.9799	31.4462
2	8	CRO	S	22.2715	23.0828	26.8048	92.4217	43.0128
20	1	CRO	S	19.05	20.1	23.8867	92.754	51.7032
20	2	CRO	S	20.74	21.925	25.205	89.7051	56.0175
20	3	CRO	S	22.7363	23.8146	29.3022	97.7712	52.6435
30	1	CRO	R	20.085	20.38	20.24	-10.1905	18.4928
30	2	CRO	R	20.72	20.66	20.75	6.04773	-4.24658
30	3	CRO	R	20.5	20.665	20.305	-28.3426	10.8071
30	4	CRO	R	21.285	21.205	20.92	-21.841	-5.7018
30	5	CRO	R	19.88	19.9667	19.8233	-10.4454	5.8304
4	1	CRO	S	19.72	20.84	22.28	63.1433	53.9906
4	2	CRO	S	22.1821	22.6929	24.8936	78.2459	29.8201
4	3	CRO	S	22.252	22.9155	24.0846	55.5307	36.8656
41	1	CRO	S	20.5633	20.3	20.2933	-0.463167	-20.0249
41	2	CRO	S	20.425	20.295	20.49	12.6427	-9.42937
41	3	CRO	S	19.085	19.34	19.615	17.355	16.2013
41	4	CRO	S	19.8833	20.4833	20.4567	-1.86558	34.0246
41	5	CRO	S	19.1167	19.1233	19.28	10.2905	0.461032
41	6	CRO	S	21.3967	21.3667	21.46	6.26455	-2.10121
44	1	CRO	S	19.4533	19.97	21.6067	67.8401	30.1015
44	2	CRO	S	20.675	21.16	22.815	68.2462	28.5503
44	3	CRO	S	22.3481	22.8496	24.814	74.3768	29.362
44	4	CRO	S	21.42	22.0567	23.2533	56.3718	35.6803
5	1	CRO	S	20.435	20.675	21.83	55.0934	15.3255
5	2	CRO	S	19.6067	20.0833	21.3167	57.4666	28.1364
5	3	CRO	S	20.6333	20.8633	22.2067	60.5891	14.7365
5	4	CRO	S	19.065	19.53	20.31	41.7633	27.5529
5	5	CRO	S	20.275	20.23	21.24	50.3454	-3.16832
5	6	CRO	S	19.995	21.21	22.59	61.5781	56.9227
5	7	CRO	S	21.9904	23.2589	25.071	71.5226	58.4906
5	8	CRO	S	22.5567	22.9528	24.3858	62.9638	24.0067
12	1	CFM	S	20.485	21.175	21.785	34.4803	38.0146
12	2	CFM	S	22.2588	22.994	23.6947	38.4727	39.9268
12	3	CFM	S	22.885	22.9626	23.6059	35.9777	5.2362
15	1	CFM	S	19.4967	19.3033	19.96	36.5658	-14.3402
15	2	CFM	S	19.2	20.075	19.815	-19.7479	45.4746
15	3	CFM	S	18.725	19.64	19.38	-19.7479	46.9656
16	1	CFM	S	19.32	20.18	20.4733	18.3986	44.9047
16	2	CFM	S	20.92	21.975	22.035	4.07359	51.8703
16	3	CFM	S	22.2914	22.6031	22.9378	20.7043	19.431
165	1	CFM	R	21.82	21.8767	22.2833	24.5636	3.85169
165	2	CFM	R	22.0467	22.5267	22.71	11.9334	28.3022
165	3	CFM	R	20.68	20.5967	21.26	36.8582	-5.94631
166	1	CFM	R	21.3533	21.51	21.72	13.5463	10.2905
166	2	CFM	R	22.2933	22.53	23.2933	41.0866	15.1296
166	3	CFM	R	21.26	21.0433	21.4367	23.8632	-16.2046
17	1	CFM	S	19.1333	20.7567	23.34	83.3145	67.5415
17	2	CFM	S	22.1855	23.0343	23.8018	41.2563	44.4768
17	3	CFM	S	20.18	20.5467	21.81	58.342	22.4428
17	4	CFM	S	21.39	22.68	26.2967	91.8478	59.1049
172	1	CFM	R	23.0167	23.5	23.6833	11.9334	28.4677
172	2	CFM	R	21.0167	21.0667	21.3533	18.0206	3.40637
172	3	CFM	R	21.1367	21.2433	21.5867	21.1782	7.12686
174	1	CFM	R	27.3133	27.4733	27.55	5.1754	10.4975
174	2	CFM	R	26.34	26.7833	27.0233	15.3255	26.4567
174	3	CFM	R	23.3733	23.3033	23.4767	11.3209	-4.97167
175	1	CFM	S	20.6633	21.5933	24.08	82.1582	47.5142
175	2	CFM	S	20.33	21.31	24.23	86.7873	49.302
175	3	CFM	S	20.8833	21.7067	23.6067	73.2057	43.4865
176	1	CFM	R	21.51	21.6	21.6967	6.48088	6.04773
176	2	CFM	R	21.9533	22.17	22.49	19.893	13.9449
176	3	CFM	R	21.8133	21.5267	21.6833	10.2905	-21.9819
179	1	CFM	S	20.5467	21.2567	22.5033	57.8579	38.868
179	2	CFM	S	19.6233	20.24	22.3733	77.2069	34.7824
179	3	CFM	S	20.9633	21.1467	22.6867	65.6115	11.9334
18	1	CFM	S	19.1933	19.51	20.02	29.7778	19.7077
18	2	CFM	S	22.0469	22.6433	22.956	19.4878	33.8572
18	3	CFM	S	19.8667	20.13	20.1233	-0.463167	16.6839
19	1	CFM	S	19.895	20.985	21.805	43.3558	53.0239
19	2	CFM	S	21.7425	22.9219	23.9568	51.197	55.8446
19	3	CFM	S	22.2791	23.1675	24.6005	62.9643	45.9791
19	4	CFM	S	21.46	22.1467	22.7167	32.6383	37.8712
191	1	CFM	R	21.58	21.74	21.75	0.69075	10.4975
191	2	CFM	R	24.4867	24.83	25.19	22.0835	21.1782
191	3	CFM	R	21.31	21.14	21.4967	21.9033	-12.5058
2	1	CFM	S	19.94	20.875	22.34	63.7764	47.6958
2	2	CFM	S	21.7327	22.2774	24.1279	72.2698	31.4462
2	3	CFM	S	22.2715	23.0828	24.2517	55.5245	43.0128
20	1	CFM	S	19.05	20.1	21.6267	65.2922	51.7032
20	2	CFM	S	20.74	21.925	23.34	62.499	56.0175
20	3	CFM	S	22.7363	23.8146	26.2492	81.5021	52.6435
30	1	CFM	R	19.88	19.9667	20.1967	14.7365	5.8304
30	2	CFM	R	23.1032	23.1577	23.1437	-0.980088	3.70724
30	3	CFM	R	20.6067	20.5133	20.49	-1.63049	-6.68322
4	1	CFM	S	19.72	20.84	21.57	39.7096	53.9906
4	2	CFM	S	22.1821	22.6929	23.7008	50.273	29.8201
4	3	CFM	S	22.252	22.9155	23.4077	28.9072	36.8656
41	1	CFM	R	19.1167	19.1233	19.5	22.9785	0.461032
41	2	CFM	R	22.4217	22.6507	22.5597	-6.51628	14.678
41	3	CFM	R	19.3567	20.1267	19.8933	-17.5548	41.3583
41	4	CFM	R	21.3967	21.3667	21.5567	12.3394	-2.10121
44	1	CFM	S	19.4533	19.97	20.52	31.698	30.1015
44	2	CFM	S	20.675	21.16	21.635	28.0533	28.5503
44	3	CFM	S	22.3481	22.8496	23.6709	43.4087	29.362
44	4	CFM	S	21.42	22.0567	22.7333	37.4391	35.6803
5	1	CFM	S	19.995	21.21	21.885	37.3668	56.9227
5	2	CFM	S	21.9904	23.2589	24.1831	47.305	58.4906
5	3	CFM	S	22.5567	22.9528	23.486	30.8983	24.0067
